# Supplementary material
Source: publisher figshare collection journal article supplement (https://springernature.figshare.com/articles/dataset/_/5016314)
Supplement: Supplementary file 1 [file 1]

## Section I: Census Information

**Interviewer completes this section for all outlets.**

|                                                                                                                                                                                                                                                                                                                                                                                                                                                                                                                                                                                                                                                                                                                                                                                                                                                                                                                                                                                |                           |                                                   |                                 |                           |  |                |                       |                                      |                        |               |          |                                      |            |             |                         |                   |              |                         |                     |                     |                          |                         |                              |                         |                  |     |                                  |  |  |
|--------------------------------------------------------------------------------------------------------------------------------------------------------------------------------------------------------------------------------------------------------------------------------------------------------------------------------------------------------------------------------------------------------------------------------------------------------------------------------------------------------------------------------------------------------------------------------------------------------------------------------------------------------------------------------------------------------------------------------------------------------------------------------------------------------------------------------------------------------------------------------------------------------------------------------------------------------------------------------|---------------------------|---------------------------------------------------|---------------------------------|---------------------------|--|----------------|-----------------------|--------------------------------------|------------------------|---------------|----------|--------------------------------------|------------|-------------|-------------------------|-------------------|--------------|-------------------------|---------------------|---------------------|--------------------------|-------------------------|------------------------------|-------------------------|------------------|-----|----------------------------------|--|--|
| <b>Outlet ID</b> Interviewer Code-District-Constituency-Sub District-Outlet ID: [ ][ ]-[ ][ ]-[ ][ ][ ][ ]-[ ][ ][ ][ ][ ]                                                                                                                                                                                                                                                                                                                                                                                                                                                                                                                                                                                                                                                                                                                                                                                                                                                     |                           |                                                   |                                 |                           |  |                |                       |                                      |                        |               |          |                                      |            |             |                         |                   |              |                         |                     |                     |                          |                         |                              |                         |                  |     |                                  |  |  |
| C1. Today's date (DD/MM/YYYY)                                                                                                                                                                                                                                                                                                                                                                                                                                                                                                                                                                                                                                                                                                                                                                                                                                                                                                                                                  |                           | [ ][ ]-[ ][ ]-[ 2 ][ ]-[ 0 ][ ]-[ 1 ][ ]-[ 1 ][ ] |                                 |                           |  |                |                       |                                      |                        |               |          |                                      |            |             |                         |                   |              |                         |                     |                     |                          |                         |                              |                         |                  |     |                                  |  |  |
| C2. Interviewer's name<br>[ ]                                                                                                                                                                                                                                                                                                                                                                                                                                                                                                                                                                                                                                                                                                                                                                                                                                                                                                                                                  |                           | C2a. Interviewer's code<br>[ ][ ]                 |                                 |                           |  |                |                       |                                      |                        |               |          |                                      |            |             |                         |                   |              |                         |                     |                     |                          |                         |                              |                         |                  |     |                                  |  |  |
| C3. District<br>[ ]                                                                                                                                                                                                                                                                                                                                                                                                                                                                                                                                                                                                                                                                                                                                                                                                                                                                                                                                                            |                           | C3a. District code<br>[ ][ ][ ]                   |                                 |                           |  |                |                       |                                      |                        |               |          |                                      |            |             |                         |                   |              |                         |                     |                     |                          |                         |                              |                         |                  |     |                                  |  |  |
| C4. Constituency<br>[ ]                                                                                                                                                                                                                                                                                                                                                                                                                                                                                                                                                                                                                                                                                                                                                                                                                                                                                                                                                        |                           | C4a. Constituency code<br>[ ][ ][ ][ ]            |                                 |                           |  |                |                       |                                      |                        |               |          |                                      |            |             |                         |                   |              |                         |                     |                     |                          |                         |                              |                         |                  |     |                                  |  |  |
| C5. Sub-District (ward)<br>[ ]                                                                                                                                                                                                                                                                                                                                                                                                                                                                                                                                                                                                                                                                                                                                                                                                                                                                                                                                                 |                           | C5a. Sub-District (ward) code<br>[ ][ ][ ]        |                                 |                           |  |                |                       |                                      |                        |               |          |                                      |            |             |                         |                   |              |                         |                     |                     |                          |                         |                              |                         |                  |     |                                  |  |  |
| C6. Name of outlet <i>If no name, record "no name" or owner's name</i><br>[ ]                                                                                                                                                                                                                                                                                                                                                                                                                                                                                                                                                                                                                                                                                                                                                                                                                                                                                                  |                           | C6a. Outlet code<br>[ ][ ][ ]                     |                                 |                           |  |                |                       |                                      |                        |               |          |                                      |            |             |                         |                   |              |                         |                     |                     |                          |                         |                              |                         |                  |     |                                  |  |  |
| <b>C7. Type of Outlet <i>Circle only one answer</i></b><br><table border="0"> <tr> <td><i>Public Health facilities</i></td> <td><i>Private Facilities</i></td> <td></td> </tr> <tr> <td>1a Health Post</td> <td>02 Pharmacy / Chemist</td> <td>09 Super/mini-market/petrol stations</td> </tr> <tr> <td>1b Rural Health Centre</td> <td>03 Drug Store</td> <td>10 Kiosk</td> </tr> <tr> <td>1c Hospital Affiliated Health Centre</td> <td>04 Surgery</td> <td>11 Kantemba</td> </tr> <tr> <td>1d Urban Health Centre.</td> <td>05 Private clinic</td> <td>12 Container</td> </tr> <tr> <td>1e First Level Hospital</td> <td>06 Private Hospital</td> <td>13 Mobile Providers</td> </tr> <tr> <td>1f Second Level Hospital</td> <td>07 NGO/Mission Hospital</td> <td>96 Other (<i>specify</i>):</td> </tr> <tr> <td>1g Third Level Hospital</td> <td>08 Grocery store</td> <td>[ ]</td> </tr> <tr> <td>1h Community Health Worker (CHW)</td> <td></td> <td></td> </tr> </table> |                           |                                                   | <i>Public Health facilities</i> | <i>Private Facilities</i> |  | 1a Health Post | 02 Pharmacy / Chemist | 09 Super/mini-market/petrol stations | 1b Rural Health Centre | 03 Drug Store | 10 Kiosk | 1c Hospital Affiliated Health Centre | 04 Surgery | 11 Kantemba | 1d Urban Health Centre. | 05 Private clinic | 12 Container | 1e First Level Hospital | 06 Private Hospital | 13 Mobile Providers | 1f Second Level Hospital | 07 NGO/Mission Hospital | 96 Other ( <i>specify</i> ): | 1g Third Level Hospital | 08 Grocery store | [ ] | 1h Community Health Worker (CHW) |  |  |
| <i>Public Health facilities</i>                                                                                                                                                                                                                                                                                                                                                                                                                                                                                                                                                                                                                                                                                                                                                                                                                                                                                                                                                | <i>Private Facilities</i> |                                                   |                                 |                           |  |                |                       |                                      |                        |               |          |                                      |            |             |                         |                   |              |                         |                     |                     |                          |                         |                              |                         |                  |     |                                  |  |  |
| 1a Health Post                                                                                                                                                                                                                                                                                                                                                                                                                                                                                                                                                                                                                                                                                                                                                                                                                                                                                                                                                                 | 02 Pharmacy / Chemist     | 09 Super/mini-market/petrol stations              |                                 |                           |  |                |                       |                                      |                        |               |          |                                      |            |             |                         |                   |              |                         |                     |                     |                          |                         |                              |                         |                  |     |                                  |  |  |
| 1b Rural Health Centre                                                                                                                                                                                                                                                                                                                                                                                                                                                                                                                                                                                                                                                                                                                                                                                                                                                                                                                                                         | 03 Drug Store             | 10 Kiosk                                          |                                 |                           |  |                |                       |                                      |                        |               |          |                                      |            |             |                         |                   |              |                         |                     |                     |                          |                         |                              |                         |                  |     |                                  |  |  |
| 1c Hospital Affiliated Health Centre                                                                                                                                                                                                                                                                                                                                                                                                                                                                                                                                                                                                                                                                                                                                                                                                                                                                                                                                           | 04 Surgery                | 11 Kantemba                                       |                                 |                           |  |                |                       |                                      |                        |               |          |                                      |            |             |                         |                   |              |                         |                     |                     |                          |                         |                              |                         |                  |     |                                  |  |  |
| 1d Urban Health Centre.                                                                                                                                                                                                                                                                                                                                                                                                                                                                                                                                                                                                                                                                                                                                                                                                                                                                                                                                                        | 05 Private clinic         | 12 Container                                      |                                 |                           |  |                |                       |                                      |                        |               |          |                                      |            |             |                         |                   |              |                         |                     |                     |                          |                         |                              |                         |                  |     |                                  |  |  |
| 1e First Level Hospital                                                                                                                                                                                                                                                                                                                                                                                                                                                                                                                                                                                                                                                                                                                                                                                                                                                                                                                                                        | 06 Private Hospital       | 13 Mobile Providers                               |                                 |                           |  |                |                       |                                      |                        |               |          |                                      |            |             |                         |                   |              |                         |                     |                     |                          |                         |                              |                         |                  |     |                                  |  |  |
| 1f Second Level Hospital                                                                                                                                                                                                                                                                                                                                                                                                                                                                                                                                                                                                                                                                                                                                                                                                                                                                                                                                                       | 07 NGO/Mission Hospital   | 96 Other ( <i>specify</i> ):                      |                                 |                           |  |                |                       |                                      |                        |               |          |                                      |            |             |                         |                   |              |                         |                     |                     |                          |                         |                              |                         |                  |     |                                  |  |  |
| 1g Third Level Hospital                                                                                                                                                                                                                                                                                                                                                                                                                                                                                                                                                                                                                                                                                                                                                                                                                                                                                                                                                        | 08 Grocery store          | [ ]                                               |                                 |                           |  |                |                       |                                      |                        |               |          |                                      |            |             |                         |                   |              |                         |                     |                     |                          |                         |                              |                         |                  |     |                                  |  |  |
| 1h Community Health Worker (CHW)                                                                                                                                                                                                                                                                                                                                                                                                                                                                                                                                                                                                                                                                                                                                                                                                                                                                                                                                               |                           |                                                   |                                 |                           |  |                |                       |                                      |                        |               |          |                                      |            |             |                         |                   |              |                         |                     |                     |                          |                         |                              |                         |                  |     |                                  |  |  |
| C7b. Is this sub-district [ward] part of the booster sample? <i>Circle one answer</i> 1 = Yes      0 = No                                                                                                                                                                                                                                                                                                                                                                                                                                                                                                                                                                                                                                                                                                                                                                                                                                                                      |                           |                                                   |                                 |                           |  |                |                       |                                      |                        |               |          |                                      |            |             |                         |                   |              |                         |                     |                     |                          |                         |                              |                         |                  |     |                                  |  |  |
| C8. <b>South:</b> Latitude reading      [ S ]-[ ][ ][ ]-[ ][ ][ ][ ][ ]                                                                                                                                                                                                                                                                                                                                                                                                                                                                                                                                                                                                                                                                                                                                                                                                                                                                                                        |                           |                                                   |                                 |                           |  |                |                       |                                      |                        |               |          |                                      |            |             |                         |                   |              |                         |                     |                     |                          |                         |                              |                         |                  |     |                                  |  |  |
| C9. <b>East:</b> Longitude reading      [ E ]-[ ][ ][ ]-[ ][ ][ ][ ][ ]                                                                                                                                                                                                                                                                                                                                                                                                                                                                                                                                                                                                                                                                                                                                                                                                                                                                                                        |                           |                                                   |                                 |                           |  |                |                       |                                      |                        |               |          |                                      |            |             |                         |                   |              |                         |                     |                     |                          |                         |                              |                         |                  |     |                                  |  |  |

**Interviewer enters outlet.**

### Screening Questions

S1. Observe the main items for sale in the outlet. **Do not ask. Observe. Multiple responses allowed.**

|                                    |                                                                                       |
|------------------------------------|---------------------------------------------------------------------------------------|
| 1 = Medicine                       |  |
| 2 = Food                           |                                                                                       |
| 3 = Toiletries                     |                                                                                       |
| 4 = Household goods /groceries     |                                                                                       |
| 5 = Mobile air time                |                                                                                       |
| 6 = Cigarettes                     |                                                                                       |
| 7 = Other ( <i>describe</i> ): [ ] |                                                                                       |

S2. Do you have any antimalarial medicines in stock today?  
**Circle one answer. If necessary, prompt with common antimalarial names.**

1 = Yes      **Provide information on study & gain consent. Go to Section II and Proceed with antimalarial audit.**

0 = No      **Go to S3**

S3. Are there any antimalarial medicines that are out of stock today, but that you stocked in the past **3 months**?  
**Circle one answer**

1 = Yes      **Provide information on study & gain consent. Go to Q13a**

0 = No      **End Interview. Go to C10 and complete Result of Visit, then record details in Ending the Interview.**

99 = Don't know      **End Interview. Go to C10 and complete Result of Visit, then record details in Ending the Interview.**

**C10. Result of Visit(s)**

|                                                                                                                                                                                                                                                                                                                                                                                         | Visit 1                 | Visit 2                 | Visit 3                 |
|-----------------------------------------------------------------------------------------------------------------------------------------------------------------------------------------------------------------------------------------------------------------------------------------------------------------------------------------------------------------------------------------|-------------------------|-------------------------|-------------------------|
| Date (dd/mm/yy)                                                                                                                                                                                                                                                                                                                                                                         | [ ]-[ ]-[ ]-[ ]-[ ]-[ ] | [ ]-[ ]-[ ]-[ ]-[ ]-[ ] | [ ]-[ ]-[ ]-[ ]-[ ]-[ ] |
| Time started<br>(use 24hr clock)                                                                                                                                                                                                                                                                                                                                                        | [ ]:[ ]:[ ]             | [ ]:[ ]:[ ]             | [ ]:[ ]:[ ]             |
| Time completed<br>(use 24hr clock)                                                                                                                                                                                                                                                                                                                                                      | [ ]:[ ]:[ ]             | [ ]:[ ]:[ ]             | [ ]:[ ]:[ ]             |
| Result                                                                                                                                                                                                                                                                                                                                                                                  | [ ]                     | [ ]                     | [ ]                     |
| 1 = Completed (Provider interview conducted)<br>2 = Outlet not eligible<br>2 = Interview interrupted <b>Go to C12 and note time convenient for call back</b><br>3 = Eligible provider not available <b>Go to C12 and note time convenient for call back</b><br>4 = Outlet not open at the time<br>5 = Outlet closed down<br>6 = Refused <b>Go to C11</b><br>7 = Other (specify):<br>[ ] |                         |                         |                         |

**C11. Refusal**

C11. If the provider refused, why?

**Circle one answer. If provider is busy with heavy client load, ask for a time he would prefer to be interviewed, note in C12 and return at this time.**

- 1 = Client load
- 2 = Thinks it's an inspection / nervous about license
- 3 = Not interested
- 4 = Refuses to give reason
- 5 = Other (specify):

[ ]

**C12. Call back notes**

C12. (Use this space to record any appointment that has been made for a call back to complete the interview)

**Section VII: Ending the Interview**

|                                                                                                                                                     |                                                                                                                                                               |
|-----------------------------------------------------------------------------------------------------------------------------------------------------|---------------------------------------------------------------------------------------------------------------------------------------------------------------|
| E1. Name of interviewee:                                                                                                                            |                                                                                                                                                               |
| 5 = Not applicable, no respondent<br>7 = Refused [ ]                                                                                                |                                                                                                                                                               |
| E2. Physical address or location identifiers of outlet (not PO box)<br>(Give detailed description that will help to find the outlet e.g. land mark) | E3. Telephone number<br>9999999995 = Not applicable, no respondent or has no telephone<br>9999999997 = Refused<br>[ ]-[ ]-[ ]-[ ]-[ ]-[ ]-[ ]-[ ]-[ ]-[ ]-[ ] |
| E7. Additional observations by interviewer (if any)                                                                                                 |                                                                                                                                                               |

**THANK THE PROVIDER AND END INTERVIEW**

## Section II: Antimalarial Audit Sheets

### ***Read to the provider:***

Can you please show us the full range of antimalarials that you currently have in stock? Do you currently have any of the following?

***Prompt entire list using antimalarial prompt card; No response to be recorded.***

- Artemether Lumefantrine such as *Coartem, Artefan, Co-Max, Lumet, Lumartem, Lumether, Lumerax*
- Artemisinin combination therapies, such as *Artecope, Lonart*
- Artemisinin monotherapies, such as *Halfan, Erither, Co-Arinate, Artesiane, Alaxin, Amoquin*
- Artemether, such as *Malartem, Sevether, Facither, Artesiane, Emal*
- Artesunate, such as *Arinate, Erisunate, Artesunate Denk, Asuamoon, Co-Arinate FDC*
- SP, such as *Fansidar, Malamine, Ar-Dar, Spymal, Malafil, Pharmadar, Novidar, Sulphadar*
- Amodiaquine, such as *Amodar, Malarid, Malaridose, Emoquine, Amobin, Amoquin, Camoquin, Alphaquine*
- Quinine, such as *Arquinine, Qinasol, Topquine, M-quine, Flaci-quin, QSM-300, Maiquinite, Kwinil, Linquine-F*
- Mefloquine, such as *Meflotas*
- Chloroquine, such as *Daraquine, Pharmaquine*
- Syrups or suspensions, such as *Alaxin, Suspension, QSM Suspension, Erinin Suspension*
- Injectables, such as *Malartem, Artesiane, Erither, Emal, Falcither, Larither, Armether, Denk 180, Faluther 80*
- Granules or powders, such as *Artequin paediatric*

***If the outlet has no antimalarials in stock, go to question 13***

***Proceed to the drug audit. Different Drug Audit sheets will be used to record the antimalarial information based on the dosage form of the medicine.***

***Separate the antimalarials into two piles:***

- ***The first pile should contain all the antimalarials in the form of tablets, suppositories, or granules. Use the Tablets, Suppositories & Granules Drug Audit Sheet to record these.***
- ***The second pile should contain all the antimalarials in any form other than tablets, suppositories or granules. Use the Non-Tablet Drug Audit Sheet to record these.***

***If additional audit sheets are used, add these sheets after the ones provided and staple the questionnaire again. All pages should be in order before you move onto the next outlet.***

**TABLET, SUPPOSITORY & GRANULE DRUG AUDIT SHEET (TSG)**

\_\_\_\_-\_\_\_\_-\_\_\_\_-\_\_\_\_-\_\_\_\_

|                                                                                                                         |                                                                                                         |                                                                                                                                                                                                                                             |                       |                                                                |                                                                                                                                                                        |                                                                                                                                                 |                                         |
|-------------------------------------------------------------------------------------------------------------------------|---------------------------------------------------------------------------------------------------------|---------------------------------------------------------------------------------------------------------------------------------------------------------------------------------------------------------------------------------------------|-----------------------|----------------------------------------------------------------|------------------------------------------------------------------------------------------------------------------------------------------------------------------------|-------------------------------------------------------------------------------------------------------------------------------------------------|-----------------------------------------|
| <div> <div>____</div> <div>____</div> <div>____</div> </div>                                                            | <b>1. Generic name</b>                                                                                  | <b>2. Strength</b>                                                                                                                                                                                                                          | <b>3. Dosage form</b> | <b>4. Brand name</b>                                           | <b>5. Manufacturer</b>                                                                                                                                                 | <b>5a. Country of manufacture</b>                                                                                                               | <b>6. Is this antimalarial expired?</b> |
|                                                                                                                         | _____                                                                                                   | _____.____mg                                                                                                                                                                                                                                | 1 = Tablet            |                                                                |                                                                                                                                                                        |                                                                                                                                                 | 1 = Yes                                 |
|                                                                                                                         | _____                                                                                                   | _____.____mg                                                                                                                                                                                                                                | 2 = Suppository       |                                                                |                                                                                                                                                                        |                                                                                                                                                 | 0 = No                                  |
|                                                                                                                         | _____                                                                                                   | _____.____mg                                                                                                                                                                                                                                | 3 = Granule           |                                                                |                                                                                                                                                                        |                                                                                                                                                 | 99 = Don't know                         |
| <div> <div>____</div> <div>Do not write here</div> </div>                                                               |                                                                                                         |                                                                                                                                                                                                                                             |                       |                                                                |                                                                                                                                                                        | <div> <div>____</div> <div>Do not write here</div> </div>                                                                                       |                                         |
| <b>7. Package size</b><br>(Fill in number)                                                                              | <b>8. Quantity in stock</b><br>(Record total # of packages or tins described in Q7)                     | <b>9. Amount sold/distributed in the last 7 days to individual consumers</b><br>(Record # of packages or tins described in Q7 OR record the total # of tablets / suppositories / granule packs sold)                                        |                       | <b>10a. Has this AM been stocked out in the past 3 months?</b> | <b>11. Retail selling price</b>                                                                                                                                        | <b>12. Wholesale purchase price</b><br>For the outlet's most recent wholesale purchase                                                          | <b>13. Comments</b>                     |
| There are a total of _____ tablets / suppositories / granule packs in each (circle type):<br>1 = Package<br>2 = Pot/tin | There are a total of _____ packages / tins / granule packs of this antimalarial in stock at this outlet | This outlet sold/distributed _____ packages or tins in the <u>last 7 days</u><br>OR<br>Outlet sold/distributed _____ tablets, suppositories or granule packs in the <u>last 7 days</u><br><b>N/A = 995; Refused = 997; Don't know = 998</b> |                       | 1 = Yes<br>0 = No<br>99 = Don't know                           | ____ tablets, suppositories or granule packs cost an individual customer<br><br>____KW<br><b>Free = 00000;</b><br><b>Refused = 99997;</b><br><b>Don't know = 99998</b> | ____ tablets, suppositories or granule packs cost<br><br>____KW<br><b>Free = 00000;</b><br><b>Refused = 99997;</b><br><b>Don't know = 99998</b> |                                         |

|                                                                                                                         |                                                                                                         |                                                                                                                                                                                                                                             |                       |                                                                |                                                                                                                                                                        |                                                                                                                                                 |                                         |
|-------------------------------------------------------------------------------------------------------------------------|---------------------------------------------------------------------------------------------------------|---------------------------------------------------------------------------------------------------------------------------------------------------------------------------------------------------------------------------------------------|-----------------------|----------------------------------------------------------------|------------------------------------------------------------------------------------------------------------------------------------------------------------------------|-------------------------------------------------------------------------------------------------------------------------------------------------|-----------------------------------------|
| <div> <div>____</div> <div>____</div> <div>____</div> </div>                                                            | <b>1. Generic name</b>                                                                                  | <b>2. Strength</b>                                                                                                                                                                                                                          | <b>3. Dosage form</b> | <b>4. Brand name</b>                                           | <b>5. Manufacturer</b>                                                                                                                                                 | <b>5a. Country of manufacture</b>                                                                                                               | <b>6. Is this antimalarial expired?</b> |
|                                                                                                                         | _____                                                                                                   | _____.____mg                                                                                                                                                                                                                                | 1 = Tablet            |                                                                |                                                                                                                                                                        |                                                                                                                                                 | 1 = Yes                                 |
|                                                                                                                         | _____                                                                                                   | _____.____mg                                                                                                                                                                                                                                | 2 = Suppository       |                                                                |                                                                                                                                                                        |                                                                                                                                                 | 0 = No                                  |
|                                                                                                                         | _____                                                                                                   | _____.____mg                                                                                                                                                                                                                                | 3 = Granule           |                                                                |                                                                                                                                                                        |                                                                                                                                                 | 99 = Don't know                         |
| <div> <div>____</div> <div>Do not write here</div> </div>                                                               |                                                                                                         |                                                                                                                                                                                                                                             |                       |                                                                |                                                                                                                                                                        | <div> <div>____</div> <div>Do not write here</div> </div>                                                                                       |                                         |
| <b>7. Package size</b><br>(Fill in number)                                                                              | <b>8. Quantity in stock</b><br>(Record total # of packages or tins described in Q7)                     | <b>9. Amount sold/distributed in the last 7 days to individual consumers</b><br>(Record # of packages or tins described in Q7 OR record the total # of tablets / suppositories / granule packs sold)                                        |                       | <b>10a. Has this AM been stocked out in the past 3 months?</b> | <b>11. Retail selling price</b>                                                                                                                                        | <b>12. Wholesale purchase price</b><br>For the outlet's most recent wholesale purchase                                                          | <b>13. Comments</b>                     |
| There are a total of _____ tablets / suppositories / granule packs in each (circle type):<br>1 = Package<br>2 = Pot/tin | There are a total of _____ packages / tins / granule packs of this antimalarial in stock at this outlet | This outlet sold/distributed _____ packages or tins in the <u>last 7 days</u><br>OR<br>Outlet sold/distributed _____ tablets, suppositories or granule packs in the <u>last 7 days</u><br><b>N/A = 995; Refused = 997; Don't know = 998</b> |                       | 1 = Yes<br>0 = No<br>99 = Don't know                           | ____ tablets, suppositories or granule packs cost an individual customer<br><br>____KW<br><b>Free = 00000;</b><br><b>Refused = 99997;</b><br><b>Don't know = 99998</b> | ____ tablets, suppositories or granule packs cost<br><br>____KW<br><b>Free = 00000;</b><br><b>Refused = 99997;</b><br><b>Don't know = 99998</b> |                                         |

[ | ]- [ | ]- [ | ]- [ | ]-

|                                                                                                                                                                                                                                                                     |                                                                                                                                                                                                                                                                                  |                                                                                                                                                                                                                                                                                                                                                                                                                                                                                                                                                                                   |                                                                                                                    |                                                                                                                                                                                                                                                                                                                                    |                                                                                                                                                                                                                                                                                                                                                                           |                     |                                                       |                                  |  |
|---------------------------------------------------------------------------------------------------------------------------------------------------------------------------------------------------------------------------------------------------------------------|----------------------------------------------------------------------------------------------------------------------------------------------------------------------------------------------------------------------------------------------------------------------------------|-----------------------------------------------------------------------------------------------------------------------------------------------------------------------------------------------------------------------------------------------------------------------------------------------------------------------------------------------------------------------------------------------------------------------------------------------------------------------------------------------------------------------------------------------------------------------------------|--------------------------------------------------------------------------------------------------------------------|------------------------------------------------------------------------------------------------------------------------------------------------------------------------------------------------------------------------------------------------------------------------------------------------------------------------------------|---------------------------------------------------------------------------------------------------------------------------------------------------------------------------------------------------------------------------------------------------------------------------------------------------------------------------------------------------------------------------|---------------------|-------------------------------------------------------|----------------------------------|--|
| <div> <div></div> <div></div> <div></div> </div>                                                                                                                                                                                                                    | 1. Generic name                                                                                                                                                                                                                                                                  | 2. Strength                                                                                                                                                                                                                                                                                                                                                                                                                                                                                                                                                                       | 3. Dosage form                                                                                                     | 4. Brand name                                                                                                                                                                                                                                                                                                                      |                                                                                                                                                                                                                                                                                                                                                                           | 5. Manufacturer     | 5a. Country of manufacture                            | 6. Is this antimalarial expired? |  |
|                                                                                                                                                                                                                                                                     |                                                                                                                                                                                                                                                                                  |                                                                                                                                                                                                                                                                                                                                                                                                                                                                                                                                                                                   |                                                                                                                    |                                                                                                                                                                                                                                                                                                                                    |                                                                                                                                                                                                                                                                                                                                                                           |                     |                                                       |                                  |  |
|                                                                                                                                                                                                                                                                     |                                                                                                                                                                                                                                                                                  |                                                                                                                                                                                                                                                                                                                                                                                                                                                                                                                                                                                   |                                                                                                                    |                                                                                                                                                                                                                                                                                                                                    |                                                                                                                                                                                                                                                                                                                                                                           |                     |                                                       |                                  |  |
| <div> <div></div> </div> <div>Do not write here</div>                                                                                                                                                                                                               |                                                                                                                                                                                                                                                                                  |                                                                                                                                                                                                                                                                                                                                                                                                                                                                                                                                                                                   |                                                                                                                    |                                                                                                                                                                                                                                                                                                                                    |                                                                                                                                                                                                                                                                                                                                                                           |                     | <div> <div></div> </div> <div>Do not write here</div> |                                  |  |
| <b>7. Package size</b><br><i>(Fill in number)</i><br><br>There are a total of<br><br><div> <div></div> <div></div> <div></div> <div></div> </div> tablets /<br>suppositories /<br>granule packs in<br>each <i>(circle type)</i> :<br><br>1 = Package<br>2 = Pot/tin | <b>8. Quantity in stock</b><br><i>(Record total # of packages or tins described in Q7)</i><br><br>There are a total of<br><br><div> <div></div> <div></div> <div></div> <div></div> </div> packages / tins /<br>granule packs of<br>this antimalarial in<br>stock at this outlet | <b>9. Amount sold/distributed in the last 7 days to individual consumers</b> <i>(Record # of packages or tins described in Q7 OR record the total # of tablets / suppositories / granule packs sold)</i><br><br>This outlet sold/distributed <div> <div></div> <div></div> <div></div> <div></div> </div> packages or tins in the <u>last 7 days</u><br>OR<br><br>Outlet sold/distributed <div> <div></div> <div></div> <div></div> <div></div> </div> tablets, suppositories or granule packs in the <u>last 7 days</u><br><br><b>N/A = 995; Refused = 997; Don't know = 998</b> | <b>10a. Has this AM been stocked out in the past 3 months?</b><br><br>1 = Yes<br><br>0 = No<br><br>99 = Don't know | <b>11. Retail selling price</b><br><br><div> <div></div> <div></div> </div> tablets, suppositories or granule packs cost an individual customer<br><br><div> <div></div> <div></div> <div></div> <div></div> <div></div> <div></div> </div> KW<br><br><b>Free = 00000;</b><br><b>Refused = 99997;</b><br><b>Don't know = 99998</b> | <b>12. Wholesale purchase price</b><br><i>For the outlet's most recent wholesale purchase</i><br><br><div> <div></div> <div></div> <div></div> <div></div> </div> tablets, suppositories or granule packs cost<br><br><div> <div></div> <div></div> <div></div> <div></div> </div> KW<br><br><b>Free = 00000;</b><br><b>Refused = 99997;</b><br><b>Don't know = 99998</b> | <b>13. Comments</b> |                                                       |                                  |  |

[ | ]- [ | ]- [ | ]- [ | ]- [ | ]

|                                                                                                                                                                                                                                                                     |                                                                                                                                                                                                                                                                                  |                                                                                                                                                                                                                                                                                                                                                                                                                                                                                                                                                                                   |                                                                                                                    |                                                                                                                                                                                                                                                                                                                         |                                                                                                                                                                                                                                                                                                                                                                           |                     |                            |                                      |                                      |
|---------------------------------------------------------------------------------------------------------------------------------------------------------------------------------------------------------------------------------------------------------------------|----------------------------------------------------------------------------------------------------------------------------------------------------------------------------------------------------------------------------------------------------------------------------------|-----------------------------------------------------------------------------------------------------------------------------------------------------------------------------------------------------------------------------------------------------------------------------------------------------------------------------------------------------------------------------------------------------------------------------------------------------------------------------------------------------------------------------------------------------------------------------------|--------------------------------------------------------------------------------------------------------------------|-------------------------------------------------------------------------------------------------------------------------------------------------------------------------------------------------------------------------------------------------------------------------------------------------------------------------|---------------------------------------------------------------------------------------------------------------------------------------------------------------------------------------------------------------------------------------------------------------------------------------------------------------------------------------------------------------------------|---------------------|----------------------------|--------------------------------------|--------------------------------------|
| <div> <div> <div></div> <div></div> </div> <div> <div></div> <div></div> </div> <div> <div></div> <div></div> </div> </div>                                                                                                                                         | 1. Generic name                                                                                                                                                                                                                                                                  | 2. Strength                                                                                                                                                                                                                                                                                                                                                                                                                                                                                                                                                                       | 3. Dosage form                                                                                                     | 4. Brand name                                                                                                                                                                                                                                                                                                           |                                                                                                                                                                                                                                                                                                                                                                           | 5. Manufacturer     | 5a. Country of manufacture | 6. Is this antimalarial expired?     |                                      |
|                                                                                                                                                                                                                                                                     | <div> <div></div> <div></div> </div>                                                                                                                                                                                                                                             | <div> <div></div> <div></div> <div></div> </div>                                                                                                                                                                                                                                                                                                                                                                                                                                                                                                                                  | <div> <div></div> <div></div> <div></div> </div>                                                                   | <div> <div></div> <div></div> <div></div> </div>                                                                                                                                                                                                                                                                        |                                                                                                                                                                                                                                                                                                                                                                           |                     |                            | <div> <div></div> <div></div> </div> | <div> <div></div> <div></div> </div> |
|                                                                                                                                                                                                                                                                     | Do not write here                                                                                                                                                                                                                                                                |                                                                                                                                                                                                                                                                                                                                                                                                                                                                                                                                                                                   |                                                                                                                    |                                                                                                                                                                                                                                                                                                                         |                                                                                                                                                                                                                                                                                                                                                                           |                     |                            | Do not write here                    | <div> <div></div> <div></div> </div> |
| <b>7. Package size</b><br><i>(Fill in number)</i><br><br>There are a total of<br><br><div> <div></div> <div></div> <div></div> <div></div> </div> tablets /<br>suppositories /<br>granule packs in<br>each <i>(circle type)</i> :<br><br>1 = Package<br>2 = Pot/tin | <b>8. Quantity in stock</b><br><i>(Record total # of packages or tins described in Q7)</i><br><br>There are a total of<br><br><div> <div></div> <div></div> <div></div> <div></div> </div> packages / tins /<br>granule packs of<br>this antimalarial in<br>stock at this outlet | <b>9. Amount sold/distributed in the last 7 days to individual consumers</b> <i>(Record # of packages or tins described in Q7 OR record the total # of tablets / suppositories / granule packs sold)</i><br><br>This outlet sold/distributed <div> <div></div> <div></div> <div></div> </div> packages or tins in the <u>last 7 days</u><br>OR<br><br>Outlet sold/distributed <div> <div></div> <div></div> <div></div> <div></div> <div></div> </div> tablets, suppositories or granule packs in the <u>last 7 days</u><br><br><b>N/A = 995; Refused = 997; Don't know = 998</b> | <b>10a. Has this AM been stocked out in the past 3 months?</b><br><br>1 = Yes<br><br>0 = No<br><br>99 = Don't know | <b>11. Retail selling price</b><br><br><div> <div></div> <div></div> </div> tablets, suppositories or granule packs cost an individual customer<br><br><div> <div></div> <div></div> <div></div> <div></div> <div></div> </div> KW<br><br><b>Free = 00000;</b><br><b>Refused = 99997;</b><br><b>Don't know = 999998</b> | <b>12. Wholesale purchase price</b><br><i>For the outlet's most recent wholesale purchase</i><br><br><div> <div></div> <div></div> <div></div> <div></div> </div> tablets, suppositories or granule packs cost<br><br><div> <div></div> <div></div> <div></div> <div></div> </div> KW<br><br><b>Free = 00000;</b><br><b>Refused = 99997;</b><br><b>Don't know = 99998</b> | <b>13. Comments</b> |                            |                                      |                                      |

[ | ]- [ | ]- [ | ]- [ | ]-

|                                                                                                                                                                                                                                                                     |                                                                                                                                                                                                                                                                                  |                                                                                                                                                                                                                                                                                                                                                                                                                                                                                                                                                                                   |                |                                                                                                                    |                                                                                                                                                                                                                                                                                                                                    |                                                                                                                                                                                                                                                                                                                                                                           |                                                        |                                  |  |
|---------------------------------------------------------------------------------------------------------------------------------------------------------------------------------------------------------------------------------------------------------------------|----------------------------------------------------------------------------------------------------------------------------------------------------------------------------------------------------------------------------------------------------------------------------------|-----------------------------------------------------------------------------------------------------------------------------------------------------------------------------------------------------------------------------------------------------------------------------------------------------------------------------------------------------------------------------------------------------------------------------------------------------------------------------------------------------------------------------------------------------------------------------------|----------------|--------------------------------------------------------------------------------------------------------------------|------------------------------------------------------------------------------------------------------------------------------------------------------------------------------------------------------------------------------------------------------------------------------------------------------------------------------------|---------------------------------------------------------------------------------------------------------------------------------------------------------------------------------------------------------------------------------------------------------------------------------------------------------------------------------------------------------------------------|--------------------------------------------------------|----------------------------------|--|
| <div> <div> <div></div> <div></div> </div> <div> <div></div> <div></div> </div> <div> <div></div> <div></div> </div> </div>                                                                                                                                         | 1. Generic name                                                                                                                                                                                                                                                                  | 2. Strength                                                                                                                                                                                                                                                                                                                                                                                                                                                                                                                                                                       | 3. Dosage form | 4. Brand name                                                                                                      |                                                                                                                                                                                                                                                                                                                                    | 5. Manufacturer                                                                                                                                                                                                                                                                                                                                                           | 5a. Country of manufacture                             | 6. Is this antimalarial expired? |  |
|                                                                                                                                                                                                                                                                     |                                                                                                                                                                                                                                                                                  |                                                                                                                                                                                                                                                                                                                                                                                                                                                                                                                                                                                   |                |                                                                                                                    |                                                                                                                                                                                                                                                                                                                                    |                                                                                                                                                                                                                                                                                                                                                                           |                                                        |                                  |  |
|                                                                                                                                                                                                                                                                     |                                                                                                                                                                                                                                                                                  |                                                                                                                                                                                                                                                                                                                                                                                                                                                                                                                                                                                   |                |                                                                                                                    |                                                                                                                                                                                                                                                                                                                                    |                                                                                                                                                                                                                                                                                                                                                                           |                                                        |                                  |  |
| <div> <div></div> <div></div> </div> Do not write here                                                                                                                                                                                                              |                                                                                                                                                                                                                                                                                  |                                                                                                                                                                                                                                                                                                                                                                                                                                                                                                                                                                                   |                |                                                                                                                    |                                                                                                                                                                                                                                                                                                                                    |                                                                                                                                                                                                                                                                                                                                                                           | <div> <div></div> <div></div> </div> Do not write here |                                  |  |
| <b>7. Package size</b><br><i>(Fill in number)</i><br><br>There are a total of<br><br><div> <div></div> <div></div> <div></div> <div></div> </div> tablets /<br>suppositories /<br>granule packs in<br>each <i>(circle type)</i> :<br><br>1 = Package<br>2 = Pot/tin | <b>8. Quantity in stock</b><br><i>(Record total # of packages or tins described in Q7)</i><br><br>There are a total of<br><br><div> <div></div> <div></div> <div></div> <div></div> </div> packages / tins /<br>granule packs of<br>this antimalarial in<br>stock at this outlet | <b>9. Amount sold/distributed in the last 7 days to individual consumers</b> <i>(Record # of packages or tins described in Q7 OR record the total # of tablets / suppositories / granule packs sold)</i><br><br>This outlet sold/distributed <div> <div></div> <div></div> <div></div> <div></div> </div> packages or tins in the <u>last 7 days</u><br>OR<br><br>Outlet sold/distributed <div> <div></div> <div></div> <div></div> <div></div> </div> tablets, suppositories or granule packs in the <u>last 7 days</u><br><br><b>N/A = 995; Refused = 997; Don't know = 998</b> |                | <b>10a. Has this AM been stocked out in the past 3 months?</b><br><br>1 = Yes<br><br>0 = No<br><br>99 = Don't know | <b>11. Retail selling price</b><br><br><div> <div></div> <div></div> </div> tablets, suppositories or granule packs cost an individual customer<br><br><div> <div></div> <div></div> <div></div> <div></div> <div></div> <div></div> </div> KW<br><br><b>Free = 00000;</b><br><b>Refused = 99997;</b><br><b>Don't know = 99998</b> | <b>12. Wholesale purchase price</b><br><i>For the outlet's most recent wholesale purchase</i><br><br><div> <div></div> <div></div> <div></div> <div></div> </div> tablets, suppositories or granule packs cost<br><br><div> <div></div> <div></div> <div></div> <div></div> </div> KW<br><br><b>Free = 00000;</b><br><b>Refused = 99997;</b><br><b>Don't know = 99998</b> | <b>13. Comments</b>                                    |                                  |  |
|                                                                                                                                                                                                                                                                     |                                                                                                                                                                                                                                                                                  |                                                                                                                                                                                                                                                                                                                                                                                                                                                                                                                                                                                   |                |                                                                                                                    |                                                                                                                                                                                                                                                                                                                                    |                                                                                                                                                                                                                                                                                                                                                                           |                                                        |                                  |  |

[ | ]- [ | ]- [ | ]- [ | ]-

|                                                                                                                                                                                                                                                                     |                                                                                                                                                                                                                                                                                  |                                                                                                                                                                                                                                                                                                                                                                                                                                                                                                                                                                       |                                                                                                                    |                                                                                                                                                                                                                                                                                                                        |                                                                                                                                                                                                                                                                                                                                                                           |                     |                                                                   |                                  |  |
|---------------------------------------------------------------------------------------------------------------------------------------------------------------------------------------------------------------------------------------------------------------------|----------------------------------------------------------------------------------------------------------------------------------------------------------------------------------------------------------------------------------------------------------------------------------|-----------------------------------------------------------------------------------------------------------------------------------------------------------------------------------------------------------------------------------------------------------------------------------------------------------------------------------------------------------------------------------------------------------------------------------------------------------------------------------------------------------------------------------------------------------------------|--------------------------------------------------------------------------------------------------------------------|------------------------------------------------------------------------------------------------------------------------------------------------------------------------------------------------------------------------------------------------------------------------------------------------------------------------|---------------------------------------------------------------------------------------------------------------------------------------------------------------------------------------------------------------------------------------------------------------------------------------------------------------------------------------------------------------------------|---------------------|-------------------------------------------------------------------|----------------------------------|--|
| <div> <div> <div></div> <div></div> </div> <div> <div></div> <div></div> </div> <div> <div></div> <div></div> </div> </div>                                                                                                                                         | 1. Generic name                                                                                                                                                                                                                                                                  | 2. Strength                                                                                                                                                                                                                                                                                                                                                                                                                                                                                                                                                           | 3. Dosage form                                                                                                     | 4. Brand name                                                                                                                                                                                                                                                                                                          |                                                                                                                                                                                                                                                                                                                                                                           | 5. Manufacturer     | 5a. Country of manufacture                                        | 6. Is this antimalarial expired? |  |
|                                                                                                                                                                                                                                                                     |                                                                                                                                                                                                                                                                                  |                                                                                                                                                                                                                                                                                                                                                                                                                                                                                                                                                                       |                                                                                                                    |                                                                                                                                                                                                                                                                                                                        |                                                                                                                                                                                                                                                                                                                                                                           |                     |                                                                   |                                  |  |
|                                                                                                                                                                                                                                                                     |                                                                                                                                                                                                                                                                                  |                                                                                                                                                                                                                                                                                                                                                                                                                                                                                                                                                                       |                                                                                                                    |                                                                                                                                                                                                                                                                                                                        |                                                                                                                                                                                                                                                                                                                                                                           |                     |                                                                   |                                  |  |
| <div> <div></div> <div></div> </div> <div>Do not write here</div>                                                                                                                                                                                                   |                                                                                                                                                                                                                                                                                  |                                                                                                                                                                                                                                                                                                                                                                                                                                                                                                                                                                       |                                                                                                                    |                                                                                                                                                                                                                                                                                                                        |                                                                                                                                                                                                                                                                                                                                                                           |                     | <div> <div></div> <div></div> </div> <div>Do not write here</div> |                                  |  |
| <b>7. Package size</b><br><i>(Fill in number)</i><br><br>There are a total of<br><br><div> <div></div> <div></div> <div></div> <div></div> </div> tablets /<br>suppositories /<br>granule packs in<br>each <i>(circle type)</i> :<br><br>1 = Package<br>2 = Pot/tin | <b>8. Quantity in stock</b><br><i>(Record total # of packages or tins described in Q7)</i><br><br>There are a total of<br><br><div> <div></div> <div></div> <div></div> <div></div> </div> packages / tins /<br>granule packs of<br>this antimalarial in<br>stock at this outlet | <b>9. Amount sold/distributed in the last 7 days to individual consumers</b> <i>(Record # of packages or tins described in Q7 OR record the total # of tablets / suppositories / granule packs sold)</i><br><br>This outlet sold/distributed <div> <div></div> <div></div> <div></div> </div> packages or tins in the <u>last 7 days</u><br>OR<br><br>Outlet sold/distributed <div> <div></div> <div></div> <div></div> <div></div> </div> tablets, suppositories or granule packs in the <u>last 7 days</u><br><br><b>N/A = 995; Refused = 997; Don't know = 998</b> | <b>10a. Has this AM been stocked out in the past 3 months?</b><br><br>1 = Yes<br><br>0 = No<br><br>99 = Don't know | <b>11. Retail selling price</b><br><br><div> <div></div> <div></div> </div> tablets, suppositories or granule packs cost an individual customer<br><br><div> <div></div> <div></div> <div></div> <div></div> <div></div> </div> KW<br><br><b>Free = 00000;</b><br><b>Refused = 99997;</b><br><b>Don't know = 99998</b> | <b>12. Wholesale purchase price</b><br><i>For the outlet's most recent wholesale purchase</i><br><br><div> <div></div> <div></div> <div></div> <div></div> </div> tablets, suppositories or granule packs cost<br><br><div> <div></div> <div></div> <div></div> <div></div> </div> KW<br><br><b>Free = 00000;</b><br><b>Refused = 99997;</b><br><b>Don't know = 99998</b> | <b>13. Comments</b> |                                                                   |                                  |  |



**TABLET, SUPPOSITORY & GRANULE DRUG AUDIT SHEET (TSG)**

----

|                                                                                                                                                                                                                                                                                       |                                                                      |                                                                                                                                                                                                                                                                                                        |                                                                                                                                                    |                                                                                                                                                                                                                                                                                                                                                                                                                                                                                                                                                                                                                         |                                              |                                                                                                            |               |                                                                                                                                                                                                                                                                                                                                                         |                 |                                                                                                                                                                                                                                                                                                                                                                                                                                                               |                                           |                     |                                      |  |
|---------------------------------------------------------------------------------------------------------------------------------------------------------------------------------------------------------------------------------------------------------------------------------------|----------------------------------------------------------------------|--------------------------------------------------------------------------------------------------------------------------------------------------------------------------------------------------------------------------------------------------------------------------------------------------------|----------------------------------------------------------------------------------------------------------------------------------------------------|-------------------------------------------------------------------------------------------------------------------------------------------------------------------------------------------------------------------------------------------------------------------------------------------------------------------------------------------------------------------------------------------------------------------------------------------------------------------------------------------------------------------------------------------------------------------------------------------------------------------------|----------------------------------------------|------------------------------------------------------------------------------------------------------------|---------------|---------------------------------------------------------------------------------------------------------------------------------------------------------------------------------------------------------------------------------------------------------------------------------------------------------------------------------------------------------|-----------------|---------------------------------------------------------------------------------------------------------------------------------------------------------------------------------------------------------------------------------------------------------------------------------------------------------------------------------------------------------------------------------------------------------------------------------------------------------------|-------------------------------------------|---------------------|--------------------------------------|--|
| <input type="text"/><br><input type="text"/><br><input type="text"/>                                                                                                                                                                                                                  | 1. Generic name                                                      |                                                                                                                                                                                                                                                                                                        | 2. Strength                                                                                                                                        |                                                                                                                                                                                                                                                                                                                                                                                                                                                                                                                                                                                                                         | 3. Dosage form                               |                                                                                                            | 4. Brand name |                                                                                                                                                                                                                                                                                                                                                         | 5. Manufacturer |                                                                                                                                                                                                                                                                                                                                                                                                                                                               | 5a. Country of manufacture                |                     | 6. Is this antimalarial expired?     |  |
|                                                                                                                                                                                                                                                                                       | <input type="text"/><br><input type="text"/><br><input type="text"/> |                                                                                                                                                                                                                                                                                                        | <input type="text"/> . <input type="text"/> mg<br><input type="text"/> . <input type="text"/> mg<br><input type="text"/> . <input type="text"/> mg |                                                                                                                                                                                                                                                                                                                                                                                                                                                                                                                                                                                                                         | 1 = Tablet<br>2 = Suppository<br>3 = Granule |                                                                                                            |               |                                                                                                                                                                                                                                                                                                                                                         |                 |                                                                                                                                                                                                                                                                                                                                                                                                                                                               |                                           |                     | 1 = Yes<br>0 = No<br>99 = Don't know |  |
|                                                                                                                                                                                                                                                                                       | <input type="text"/><br>Do not write here                            |                                                                                                                                                                                                                                                                                                        |                                                                                                                                                    |                                                                                                                                                                                                                                                                                                                                                                                                                                                                                                                                                                                                                         |                                              |                                                                                                            |               |                                                                                                                                                                                                                                                                                                                                                         |                 |                                                                                                                                                                                                                                                                                                                                                                                                                                                               | <input type="text"/><br>Do not write here |                     |                                      |  |
| <b>7. Package size</b><br><i>(Fill in number)</i><br><br>There are a total of<br><input type="text"/> <input type="text"/> <input type="text"/> <input type="text"/><br>tablets /<br>suppositories /<br>granule packs in<br>each <i>(circle type)</i> :<br>1 = Package<br>2 = Pot/tin |                                                                      | <b>8. Quantity in stock</b><br><i>(Record total # of packages or tins described in Q7)</i><br><br>There are a total of<br><input type="text"/> <input type="text"/> <input type="text"/> <input type="text"/><br>packages / tins /<br>this antimalarial in<br>stock at this outlet                     |                                                                                                                                                    | <b>9. Amount sold/distributed in the last 7 days to individual consumers</b> <i>(Record # of packages or tins described in Q7 OR record the total # of tablets / suppositories / granule packs sold)</i><br><br>This outlet sold/distributed <input type="text"/> <input type="text"/> <input type="text"/> <input type="text"/> packages or tins in the <u>last 7 days</u><br>OR<br>Outlet sold/distributed <input type="text"/> <input type="text"/> <input type="text"/> <input type="text"/> tablets, suppositories or granule packs in the <u>last 7 days</u><br><b>N/A = 995; Refused = 997; Don't know = 998</b> |                                              | <b>10a. Has this AM been stocked out in the past 3 months?</b><br><br>1 = Yes<br>0 = No<br>99 = Don't know |               | <b>11. Retail selling price</b><br><br><input type="text"/> <input type="text"/> tablets, suppositories or granule packs cost an individual customer<br><br><input type="text"/> <input type="text"/> <input type="text"/> <input type="text"/> <input type="text"/> KW<br><b>Free = 00000;</b><br><b>Refused = 99997;</b><br><b>Don't know = 99998</b> |                 | <b>12. Wholesale purchase price</b><br><i>For the outlet's most recent wholesale purchase</i><br><br><input type="text"/> <input type="text"/> <input type="text"/> <input type="text"/> <input type="text"/> tablets, suppositories or granule packs cost<br><br><input type="text"/> <input type="text"/> <input type="text"/> <input type="text"/> <input type="text"/> KW<br><b>Free = 00000;</b><br><b>Refused = 99997;</b><br><b>Don't know = 99998</b> |                                           | <b>13. Comments</b> |                                      |  |
| <input type="text"/><br><input type="text"/><br><input type="text"/>                                                                                                                                                                                                                  | 1. Generic name                                                      |                                                                                                                                                                                                                                                                                                        | 2. Strength                                                                                                                                        |                                                                                                                                                                                                                                                                                                                                                                                                                                                                                                                                                                                                                         | 3. Dosage form                               |                                                                                                            | 4. Brand name |                                                                                                                                                                                                                                                                                                                                                         | 5. Manufacturer |                                                                                                                                                                                                                                                                                                                                                                                                                                                               | 5a. Country of manufacture                |                     | 6. Is this antimalarial expired?     |  |
|                                                                                                                                                                                                                                                                                       | <input type="text"/><br><input type="text"/><br><input type="text"/> |                                                                                                                                                                                                                                                                                                        | <input type="text"/> . <input type="text"/> mg<br><input type="text"/> . <input type="text"/> mg<br><input type="text"/> . <input type="text"/> mg |                                                                                                                                                                                                                                                                                                                                                                                                                                                                                                                                                                                                                         | 1 = Tablet<br>2 = Suppository<br>3 = Granule |                                                                                                            |               |                                                                                                                                                                                                                                                                                                                                                         |                 |                                                                                                                                                                                                                                                                                                                                                                                                                                                               |                                           |                     | 1 = Yes<br>0 = No<br>99 = Don't know |  |
|                                                                                                                                                                                                                                                                                       | <input type="text"/><br>Do not write here                            |                                                                                                                                                                                                                                                                                                        |                                                                                                                                                    |                                                                                                                                                                                                                                                                                                                                                                                                                                                                                                                                                                                                                         |                                              |                                                                                                            |               |                                                                                                                                                                                                                                                                                                                                                         |                 |                                                                                                                                                                                                                                                                                                                                                                                                                                                               | <input type="text"/><br>Do not write here |                     |                                      |  |
| <b>7. Package size</b><br><i>(Fill in number)</i><br><br>There are a total of<br><input type="text"/> <input type="text"/> <input type="text"/> <input type="text"/><br>tablets /<br>suppositories /<br>granule packs in<br>each <i>(circle type)</i> :<br>1 = Package<br>2 = Pot/tin |                                                                      | <b>8. Quantity in stock</b><br><i>(Record total # of packages or tins described in Q7)</i><br><br>There are a total of<br><input type="text"/> <input type="text"/> <input type="text"/> <input type="text"/><br>packages / tins /<br>granule packs of<br>this antimalarial in<br>stock at this outlet |                                                                                                                                                    | <b>9. Amount sold/distributed in the last 7 days to individual consumers</b> <i>(Record # of packages or tins described in Q7 OR record the total # of tablets / suppositories / granule packs sold)</i><br><br>This outlet sold/distributed <input type="text"/> <input type="text"/> <input type="text"/> <input type="text"/> packages or tins in the <u>last 7 days</u><br>OR<br>Outlet sold/distributed <input type="text"/> <input type="text"/> <input type="text"/> <input type="text"/> tablets, suppositories or granule packs in the <u>last 7 days</u><br><b>N/A = 995; Refused = 997; Don't know = 998</b> |                                              | <b>10a. Has this AM been stocked out in the past 3 months?</b><br><br>1 = Yes<br>0 = No<br>99 = Don't know |               | <b>11. Retail selling price</b><br><br><input type="text"/> <input type="text"/> tablets, suppositories or granule packs cost an individual customer<br><br><input type="text"/> <input type="text"/> <input type="text"/> <input type="text"/> <input type="text"/> KW<br><b>Free = 00000;</b><br><b>Refused = 99997;</b><br><b>Don't know = 99998</b> |                 | <b>12. Wholesale purchase price</b><br><i>For the outlet's most recent wholesale purchase</i><br><br><input type="text"/> <input type="text"/> <input type="text"/> <input type="text"/> <input type="text"/> tablets, suppositories or granule packs cost<br><br><input type="text"/> <input type="text"/> <input type="text"/> <input type="text"/> <input type="text"/> KW<br><b>Free = 00000;</b><br><b>Refused = 99997;</b><br><b>Don't know = 99998</b> |                                           | <b>13. Comments</b> |                                      |  |

[ | ]- [ | ]- [ | ]- [ | ]- [ | ]

|                                                                                                                                                                                                                                                                     |                                                                                                                                                                                                                                                                                  |                                                                                                                                                                                                                                                                                                                                                                                                                                                                                                                                                                                   |                                                                                                                    |                                                                                                                                                                                                                                                                                                                                    |                                                                                                                                                                                                                                                                                                                                                                           |                     |                                                       |                                  |  |
|---------------------------------------------------------------------------------------------------------------------------------------------------------------------------------------------------------------------------------------------------------------------|----------------------------------------------------------------------------------------------------------------------------------------------------------------------------------------------------------------------------------------------------------------------------------|-----------------------------------------------------------------------------------------------------------------------------------------------------------------------------------------------------------------------------------------------------------------------------------------------------------------------------------------------------------------------------------------------------------------------------------------------------------------------------------------------------------------------------------------------------------------------------------|--------------------------------------------------------------------------------------------------------------------|------------------------------------------------------------------------------------------------------------------------------------------------------------------------------------------------------------------------------------------------------------------------------------------------------------------------------------|---------------------------------------------------------------------------------------------------------------------------------------------------------------------------------------------------------------------------------------------------------------------------------------------------------------------------------------------------------------------------|---------------------|-------------------------------------------------------|----------------------------------|--|
| <div> <div></div> <div></div> <div></div> </div>                                                                                                                                                                                                                    | 1. Generic name                                                                                                                                                                                                                                                                  | 2. Strength                                                                                                                                                                                                                                                                                                                                                                                                                                                                                                                                                                       | 3. Dosage form                                                                                                     | 4. Brand name                                                                                                                                                                                                                                                                                                                      |                                                                                                                                                                                                                                                                                                                                                                           | 5. Manufacturer     | 5a. Country of manufacture                            | 6. Is this antimalarial expired? |  |
|                                                                                                                                                                                                                                                                     |                                                                                                                                                                                                                                                                                  |                                                                                                                                                                                                                                                                                                                                                                                                                                                                                                                                                                                   |                                                                                                                    |                                                                                                                                                                                                                                                                                                                                    |                                                                                                                                                                                                                                                                                                                                                                           |                     |                                                       |                                  |  |
|                                                                                                                                                                                                                                                                     |                                                                                                                                                                                                                                                                                  |                                                                                                                                                                                                                                                                                                                                                                                                                                                                                                                                                                                   |                                                                                                                    |                                                                                                                                                                                                                                                                                                                                    |                                                                                                                                                                                                                                                                                                                                                                           |                     |                                                       |                                  |  |
| <div> <div></div> </div> <div>Do not write here</div>                                                                                                                                                                                                               |                                                                                                                                                                                                                                                                                  |                                                                                                                                                                                                                                                                                                                                                                                                                                                                                                                                                                                   |                                                                                                                    |                                                                                                                                                                                                                                                                                                                                    |                                                                                                                                                                                                                                                                                                                                                                           |                     | <div> <div></div> </div> <div>Do not write here</div> |                                  |  |
| <b>7. Package size</b><br><i>(Fill in number)</i><br><br>There are a total of<br><br><div> <div></div> <div></div> <div></div> <div></div> </div> tablets /<br>suppositories /<br>granule packs in<br>each <i>(circle type)</i> :<br><br>1 = Package<br>2 = Pot/tin | <b>8. Quantity in stock</b><br><i>(Record total # of packages or tins described in Q7)</i><br><br>There are a total of<br><br><div> <div></div> <div></div> <div></div> <div></div> </div> packages / tins /<br>granule packs of<br>this antimalarial in<br>stock at this outlet | <b>9. Amount sold/distributed in the last 7 days to individual consumers</b> <i>(Record # of packages or tins described in Q7 OR record the total # of tablets / suppositories / granule packs sold)</i><br><br>This outlet sold/distributed <div> <div></div> <div></div> <div></div> <div></div> </div> packages or tins in the <u>last 7 days</u><br>OR<br><br>Outlet sold/distributed <div> <div></div> <div></div> <div></div> <div></div> </div> tablets, suppositories or granule packs in the <u>last 7 days</u><br><br><b>N/A = 995; Refused = 997; Don't know = 998</b> | <b>10a. Has this AM been stocked out in the past 3 months?</b><br><br>1 = Yes<br><br>0 = No<br><br>99 = Don't know | <b>11. Retail selling price</b><br><br><div> <div></div> <div></div> </div> tablets, suppositories or granule packs cost an individual customer<br><br><div> <div></div> <div></div> <div></div> <div></div> <div></div> <div></div> </div> KW<br><br><b>Free = 00000;</b><br><b>Refused = 99997;</b><br><b>Don't know = 99998</b> | <b>12. Wholesale purchase price</b><br><i>For the outlet's most recent wholesale purchase</i><br><br><div> <div></div> <div></div> <div></div> <div></div> </div> tablets, suppositories or granule packs cost<br><br><div> <div></div> <div></div> <div></div> <div></div> </div> KW<br><br><b>Free = 00000;</b><br><b>Refused = 99997;</b><br><b>Don't know = 99998</b> | <b>13. Comments</b> |                                                       |                                  |  |

[ | ]- [ | ]- [ | ]- [ | ]- [ | ]

|                                                                                                                                                                                                                                                                     |                                                                                                                                                                                                                                                                                  |                                                                                                                                                                                                                                                                                                                                                                                                                                                                                                                                                                                          |                                                                                                                    |                                                                                                                                                                                                                                                                                                                                    |                                                                                                                                                                                                                                                                                                                                                                           |                     |                                                                   |                                  |  |
|---------------------------------------------------------------------------------------------------------------------------------------------------------------------------------------------------------------------------------------------------------------------|----------------------------------------------------------------------------------------------------------------------------------------------------------------------------------------------------------------------------------------------------------------------------------|------------------------------------------------------------------------------------------------------------------------------------------------------------------------------------------------------------------------------------------------------------------------------------------------------------------------------------------------------------------------------------------------------------------------------------------------------------------------------------------------------------------------------------------------------------------------------------------|--------------------------------------------------------------------------------------------------------------------|------------------------------------------------------------------------------------------------------------------------------------------------------------------------------------------------------------------------------------------------------------------------------------------------------------------------------------|---------------------------------------------------------------------------------------------------------------------------------------------------------------------------------------------------------------------------------------------------------------------------------------------------------------------------------------------------------------------------|---------------------|-------------------------------------------------------------------|----------------------------------|--|
| <div> <div> <div></div> <div></div> </div> <div> <div></div> <div></div> </div> <div> <div></div> <div></div> </div> </div>                                                                                                                                         | 1. Generic name                                                                                                                                                                                                                                                                  | 2. Strength                                                                                                                                                                                                                                                                                                                                                                                                                                                                                                                                                                              | 3. Dosage form                                                                                                     | 4. Brand name                                                                                                                                                                                                                                                                                                                      |                                                                                                                                                                                                                                                                                                                                                                           | 5. Manufacturer     | 5a. Country of manufacture                                        | 6. Is this antimalarial expired? |  |
|                                                                                                                                                                                                                                                                     |                                                                                                                                                                                                                                                                                  |                                                                                                                                                                                                                                                                                                                                                                                                                                                                                                                                                                                          |                                                                                                                    |                                                                                                                                                                                                                                                                                                                                    |                                                                                                                                                                                                                                                                                                                                                                           |                     |                                                                   |                                  |  |
|                                                                                                                                                                                                                                                                     |                                                                                                                                                                                                                                                                                  |                                                                                                                                                                                                                                                                                                                                                                                                                                                                                                                                                                                          |                                                                                                                    |                                                                                                                                                                                                                                                                                                                                    |                                                                                                                                                                                                                                                                                                                                                                           |                     |                                                                   |                                  |  |
| <div> <div></div> <div></div> </div> <div>Do not write here</div>                                                                                                                                                                                                   |                                                                                                                                                                                                                                                                                  |                                                                                                                                                                                                                                                                                                                                                                                                                                                                                                                                                                                          |                                                                                                                    |                                                                                                                                                                                                                                                                                                                                    |                                                                                                                                                                                                                                                                                                                                                                           |                     | <div> <div></div> <div></div> </div> <div>Do not write here</div> |                                  |  |
| <b>7. Package size</b><br><i>(Fill in number)</i><br><br>There are a total of<br><br><div> <div></div> <div></div> <div></div> <div></div> </div> tablets /<br>suppositories /<br>granule packs in<br>each <i>(circle type)</i> :<br><br>1 = Package<br>2 = Pot/tin | <b>8. Quantity in stock</b><br><i>(Record total # of packages or tins described in Q7)</i><br><br>There are a total of<br><br><div> <div></div> <div></div> <div></div> <div></div> </div> packages / tins /<br>granule packs of<br>this antimalarial in<br>stock at this outlet | <b>9. Amount sold/distributed in the last 7 days to individual consumers</b> <i>(Record # of packages or tins described in Q7 OR record the total # of tablets / suppositories / granule packs sold)</i><br><br>This outlet sold/distributed <div> <div></div> <div></div> <div></div> <div></div> </div> packages or tins in the <u>last 7 days</u><br><div>OR</div><br>Outlet sold/distributed <div> <div></div> <div></div> <div></div> <div></div> </div> tablets, suppositories or granule packs in the <u>last 7 days</u><br><br><b>N/A = 995; Refused = 997; Don't know = 998</b> | <b>10a. Has this AM been stocked out in the past 3 months?</b><br><br>1 = Yes<br><br>0 = No<br><br>99 = Don't know | <b>11. Retail selling price</b><br><br><div> <div></div> <div></div> </div> tablets, suppositories or granule packs cost an individual customer<br><br><div> <div></div> <div></div> <div></div> <div></div> <div></div> <div></div> </div> KW<br><br><b>Free = 00000;</b><br><b>Refused = 99997;</b><br><b>Don't know = 99998</b> | <b>12. Wholesale purchase price</b><br><i>For the outlet's most recent wholesale purchase</i><br><br><div> <div></div> <div></div> <div></div> <div></div> </div> tablets, suppositories or granule packs cost<br><br><div> <div></div> <div></div> <div></div> <div></div> </div> KW<br><br><b>Free = 00000;</b><br><b>Refused = 99997;</b><br><b>Don't know = 99998</b> | <b>13. Comments</b> |                                                                   |                                  |  |

[ | ]- [ | ]- [ | ]- [ | ]- [ | ]

|                                                                                                                                                                                                                                                                     |                                                                                                                                                                                                                                                                                  |                                                                                                                                                                                                                                                                                                                                                                                                                                                                                                                                                                                   |                |                                                                                                                    |                                                                                                                                                                                                                                                                                                                                    |                                                                                                                                                                                                                                                                                                                                                                           |                                                       |                                  |  |
|---------------------------------------------------------------------------------------------------------------------------------------------------------------------------------------------------------------------------------------------------------------------|----------------------------------------------------------------------------------------------------------------------------------------------------------------------------------------------------------------------------------------------------------------------------------|-----------------------------------------------------------------------------------------------------------------------------------------------------------------------------------------------------------------------------------------------------------------------------------------------------------------------------------------------------------------------------------------------------------------------------------------------------------------------------------------------------------------------------------------------------------------------------------|----------------|--------------------------------------------------------------------------------------------------------------------|------------------------------------------------------------------------------------------------------------------------------------------------------------------------------------------------------------------------------------------------------------------------------------------------------------------------------------|---------------------------------------------------------------------------------------------------------------------------------------------------------------------------------------------------------------------------------------------------------------------------------------------------------------------------------------------------------------------------|-------------------------------------------------------|----------------------------------|--|
| <div> <div></div> <div></div> <div></div> </div>                                                                                                                                                                                                                    | 1. Generic name                                                                                                                                                                                                                                                                  | 2. Strength                                                                                                                                                                                                                                                                                                                                                                                                                                                                                                                                                                       | 3. Dosage form | 4. Brand name                                                                                                      |                                                                                                                                                                                                                                                                                                                                    | 5. Manufacturer                                                                                                                                                                                                                                                                                                                                                           | 5a. Country of manufacture                            | 6. Is this antimalarial expired? |  |
|                                                                                                                                                                                                                                                                     |                                                                                                                                                                                                                                                                                  |                                                                                                                                                                                                                                                                                                                                                                                                                                                                                                                                                                                   |                |                                                                                                                    |                                                                                                                                                                                                                                                                                                                                    |                                                                                                                                                                                                                                                                                                                                                                           |                                                       |                                  |  |
|                                                                                                                                                                                                                                                                     |                                                                                                                                                                                                                                                                                  |                                                                                                                                                                                                                                                                                                                                                                                                                                                                                                                                                                                   |                |                                                                                                                    |                                                                                                                                                                                                                                                                                                                                    |                                                                                                                                                                                                                                                                                                                                                                           |                                                       |                                  |  |
| <div> <div></div> </div> <div>Do not write here</div>                                                                                                                                                                                                               |                                                                                                                                                                                                                                                                                  |                                                                                                                                                                                                                                                                                                                                                                                                                                                                                                                                                                                   |                |                                                                                                                    |                                                                                                                                                                                                                                                                                                                                    |                                                                                                                                                                                                                                                                                                                                                                           | <div> <div></div> </div> <div>Do not write here</div> |                                  |  |
| <b>7. Package size</b><br><i>(Fill in number)</i><br><br>There are a total of<br><br><div> <div></div> <div></div> <div></div> <div></div> </div> tablets /<br>suppositories /<br>granule packs in<br>each <i>(circle type)</i> :<br><br>1 = Package<br>2 = Pot/tin | <b>8. Quantity in stock</b><br><i>(Record total # of packages or tins described in Q7)</i><br><br>There are a total of<br><br><div> <div></div> <div></div> <div></div> <div></div> </div> packages / tins /<br>granule packs of<br>this antimalarial in<br>stock at this outlet | <b>9. Amount sold/distributed in the last 7 days to individual consumers</b> <i>(Record # of packages or tins described in Q7 OR record the total # of tablets / suppositories / granule packs sold)</i><br><br>This outlet sold/distributed <div> <div></div> <div></div> <div></div> <div></div> </div> packages or tins in the <u>last 7 days</u><br>OR<br><br>Outlet sold/distributed <div> <div></div> <div></div> <div></div> <div></div> </div> tablets, suppositories or granule packs in the <u>last 7 days</u><br><br><b>N/A = 995; Refused = 997; Don't know = 998</b> |                | <b>10a. Has this AM been stocked out in the past 3 months?</b><br><br>1 = Yes<br><br>0 = No<br><br>99 = Don't know | <b>11. Retail selling price</b><br><br><div> <div></div> <div></div> </div> tablets, suppositories or granule packs cost an individual customer<br><br><div> <div></div> <div></div> <div></div> <div></div> <div></div> <div></div> </div> KW<br><br><b>Free = 00000;</b><br><b>Refused = 99997;</b><br><b>Don't know = 99998</b> | <b>12. Wholesale purchase price</b><br><i>For the outlet's most recent wholesale purchase</i><br><br><div> <div></div> <div></div> <div></div> <div></div> </div> tablets, suppositories or granule packs cost<br><br><div> <div></div> <div></div> <div></div> <div></div> </div> KW<br><br><b>Free = 00000;</b><br><b>Refused = 99997;</b><br><b>Don't know = 99998</b> | <b>13. Comments</b>                                   |                                  |  |
|                                                                                                                                                                                                                                                                     |                                                                                                                                                                                                                                                                                  |                                                                                                                                                                                                                                                                                                                                                                                                                                                                                                                                                                                   |                |                                                                                                                    |                                                                                                                                                                                                                                                                                                                                    |                                                                                                                                                                                                                                                                                                                                                                           |                                                       |                                  |  |

[ | ]- [ | ]- [ | ]- [ | ]- [ | ]

|                                                                                                                                                                                                                                                                     |                                                                                                                                                                                                                                                                                  |                                                                                                                                                                                                                                                                                                                                                                                                                                                                                                                                                                                   |                                                                                                                    |                                                                                                                                                                                                                                                                                                                                    |                                                                                                                                                                                                                                                                                                                                                                           |                     |                                                       |                                  |  |
|---------------------------------------------------------------------------------------------------------------------------------------------------------------------------------------------------------------------------------------------------------------------|----------------------------------------------------------------------------------------------------------------------------------------------------------------------------------------------------------------------------------------------------------------------------------|-----------------------------------------------------------------------------------------------------------------------------------------------------------------------------------------------------------------------------------------------------------------------------------------------------------------------------------------------------------------------------------------------------------------------------------------------------------------------------------------------------------------------------------------------------------------------------------|--------------------------------------------------------------------------------------------------------------------|------------------------------------------------------------------------------------------------------------------------------------------------------------------------------------------------------------------------------------------------------------------------------------------------------------------------------------|---------------------------------------------------------------------------------------------------------------------------------------------------------------------------------------------------------------------------------------------------------------------------------------------------------------------------------------------------------------------------|---------------------|-------------------------------------------------------|----------------------------------|--|
| <div> <div></div> <div></div> <div></div> </div>                                                                                                                                                                                                                    | 1. Generic name                                                                                                                                                                                                                                                                  | 2. Strength                                                                                                                                                                                                                                                                                                                                                                                                                                                                                                                                                                       | 3. Dosage form                                                                                                     | 4. Brand name                                                                                                                                                                                                                                                                                                                      |                                                                                                                                                                                                                                                                                                                                                                           | 5. Manufacturer     | 5a. Country of manufacture                            | 6. Is this antimalarial expired? |  |
|                                                                                                                                                                                                                                                                     |                                                                                                                                                                                                                                                                                  |                                                                                                                                                                                                                                                                                                                                                                                                                                                                                                                                                                                   |                                                                                                                    |                                                                                                                                                                                                                                                                                                                                    |                                                                                                                                                                                                                                                                                                                                                                           |                     |                                                       |                                  |  |
|                                                                                                                                                                                                                                                                     |                                                                                                                                                                                                                                                                                  |                                                                                                                                                                                                                                                                                                                                                                                                                                                                                                                                                                                   |                                                                                                                    |                                                                                                                                                                                                                                                                                                                                    |                                                                                                                                                                                                                                                                                                                                                                           |                     |                                                       |                                  |  |
| <div> <div></div> </div> <div>Do not write here</div>                                                                                                                                                                                                               |                                                                                                                                                                                                                                                                                  |                                                                                                                                                                                                                                                                                                                                                                                                                                                                                                                                                                                   |                                                                                                                    |                                                                                                                                                                                                                                                                                                                                    |                                                                                                                                                                                                                                                                                                                                                                           |                     | <div> <div></div> </div> <div>Do not write here</div> |                                  |  |
| <b>7. Package size</b><br><i>(Fill in number)</i><br><br>There are a total of<br><br><div> <div></div> <div></div> <div></div> <div></div> </div> tablets /<br>suppositories /<br>granule packs in<br>each <i>(circle type)</i> :<br><br>1 = Package<br>2 = Pot/tin | <b>8. Quantity in stock</b><br><i>(Record total # of packages or tins described in Q7)</i><br><br>There are a total of<br><br><div> <div></div> <div></div> <div></div> <div></div> </div> packages / tins /<br>granule packs of<br>this antimalarial in<br>stock at this outlet | <b>9. Amount sold/distributed in the last 7 days to individual consumers</b> <i>(Record # of packages or tins described in Q7 OR record the total # of tablets / suppositories / granule packs sold)</i><br><br>This outlet sold/distributed <div> <div></div> <div></div> <div></div> <div></div> </div> packages or tins in the <u>last 7 days</u><br>OR<br><br>Outlet sold/distributed <div> <div></div> <div></div> <div></div> <div></div> </div> tablets, suppositories or granule packs in the <u>last 7 days</u><br><br><b>N/A = 995; Refused = 997; Don't know = 998</b> | <b>10a. Has this AM been stocked out in the past 3 months?</b><br><br>1 = Yes<br><br>0 = No<br><br>99 = Don't know | <b>11. Retail selling price</b><br><br><div> <div></div> <div></div> </div> tablets, suppositories or granule packs cost an individual customer<br><br><div> <div></div> <div></div> <div></div> <div></div> <div></div> <div></div> </div> KW<br><br><b>Free = 00000;</b><br><b>Refused = 99997;</b><br><b>Don't know = 99998</b> | <b>12. Wholesale purchase price</b><br><i>For the outlet's most recent wholesale purchase</i><br><br><div> <div></div> <div></div> <div></div> <div></div> </div> tablets, suppositories or granule packs cost<br><br><div> <div></div> <div></div> <div></div> <div></div> </div> KW<br><br><b>Free = 00000;</b><br><b>Refused = 99997;</b><br><b>Don't know = 99998</b> | <b>13. Comments</b> |                                                       |                                  |  |

[ | ]- [ | ]- [ | ]- [ | ]- [ | ]

|                                                                                                                                                                                                                                                                     |                                                                                                                                                                                                                                                                                  |                                                                                                                                                                                                                                                                                                                                                                                                                                                                                                                                                                                   |                                                                                                                    |                                                                                                                                                                                                                                                                                                                                    |                                                                                                                                                                                                                                                                                                                                                                           |                     |                                                       |                                  |  |
|---------------------------------------------------------------------------------------------------------------------------------------------------------------------------------------------------------------------------------------------------------------------|----------------------------------------------------------------------------------------------------------------------------------------------------------------------------------------------------------------------------------------------------------------------------------|-----------------------------------------------------------------------------------------------------------------------------------------------------------------------------------------------------------------------------------------------------------------------------------------------------------------------------------------------------------------------------------------------------------------------------------------------------------------------------------------------------------------------------------------------------------------------------------|--------------------------------------------------------------------------------------------------------------------|------------------------------------------------------------------------------------------------------------------------------------------------------------------------------------------------------------------------------------------------------------------------------------------------------------------------------------|---------------------------------------------------------------------------------------------------------------------------------------------------------------------------------------------------------------------------------------------------------------------------------------------------------------------------------------------------------------------------|---------------------|-------------------------------------------------------|----------------------------------|--|
| <div> <div></div> <div></div> <div></div> </div>                                                                                                                                                                                                                    | 1. Generic name                                                                                                                                                                                                                                                                  | 2. Strength                                                                                                                                                                                                                                                                                                                                                                                                                                                                                                                                                                       | 3. Dosage form                                                                                                     | 4. Brand name                                                                                                                                                                                                                                                                                                                      |                                                                                                                                                                                                                                                                                                                                                                           | 5. Manufacturer     | 5a. Country of manufacture                            | 6. Is this antimalarial expired? |  |
|                                                                                                                                                                                                                                                                     |                                                                                                                                                                                                                                                                                  |                                                                                                                                                                                                                                                                                                                                                                                                                                                                                                                                                                                   |                                                                                                                    |                                                                                                                                                                                                                                                                                                                                    |                                                                                                                                                                                                                                                                                                                                                                           |                     |                                                       |                                  |  |
|                                                                                                                                                                                                                                                                     |                                                                                                                                                                                                                                                                                  |                                                                                                                                                                                                                                                                                                                                                                                                                                                                                                                                                                                   |                                                                                                                    |                                                                                                                                                                                                                                                                                                                                    |                                                                                                                                                                                                                                                                                                                                                                           |                     |                                                       |                                  |  |
| <div> <div></div> </div> <div>Do not write here</div>                                                                                                                                                                                                               |                                                                                                                                                                                                                                                                                  |                                                                                                                                                                                                                                                                                                                                                                                                                                                                                                                                                                                   |                                                                                                                    |                                                                                                                                                                                                                                                                                                                                    |                                                                                                                                                                                                                                                                                                                                                                           |                     | <div> <div></div> </div> <div>Do not write here</div> |                                  |  |
| <b>7. Package size</b><br><i>(Fill in number)</i><br><br>There are a total of<br><br><div> <div></div> <div></div> <div></div> <div></div> </div> tablets /<br>suppositories /<br>granule packs in<br>each <i>(circle type)</i> :<br><br>1 = Package<br>2 = Pot/tin | <b>8. Quantity in stock</b><br><i>(Record total # of packages or tins described in Q7)</i><br><br>There are a total of<br><br><div> <div></div> <div></div> <div></div> <div></div> </div> packages / tins /<br>granule packs of<br>this antimalarial in<br>stock at this outlet | <b>9. Amount sold/distributed in the last 7 days to individual consumers</b> <i>(Record # of packages or tins described in Q7 OR record the total # of tablets / suppositories / granule packs sold)</i><br><br>This outlet sold/distributed <div> <div></div> <div></div> <div></div> <div></div> </div> packages or tins in the <u>last 7 days</u><br>OR<br><br>Outlet sold/distributed <div> <div></div> <div></div> <div></div> <div></div> </div> tablets, suppositories or granule packs in the <u>last 7 days</u><br><br><b>N/A = 995; Refused = 997; Don't know = 998</b> | <b>10a. Has this AM been stocked out in the past 3 months?</b><br><br>1 = Yes<br><br>0 = No<br><br>99 = Don't know | <b>11. Retail selling price</b><br><br><div> <div></div> <div></div> </div> tablets, suppositories or granule packs cost an individual customer<br><br><div> <div></div> <div></div> <div></div> <div></div> <div></div> <div></div> </div> KW<br><br><b>Free = 00000;</b><br><b>Refused = 99997;</b><br><b>Don't know = 99998</b> | <b>12. Wholesale purchase price</b><br><i>For the outlet's most recent wholesale purchase</i><br><br><div> <div></div> <div></div> <div></div> <div></div> </div> tablets, suppositories or granule packs cost<br><br><div> <div></div> <div></div> <div></div> <div></div> </div> KW<br><br><b>Free = 00000;</b><br><b>Refused = 99997;</b><br><b>Don't know = 99998</b> | <b>13. Comments</b> |                                                       |                                  |  |

[ | ]- [ | ]- [ | ]- [ | ]- [ | ]

|                                                                                                                                                                                                                                                                     |                                                                                                                                                                                                                                                                                  |                                                                                                                                                                                                                                                                                                                                                                                                                                                                                                                                                                       |                                                                                                                    |                                                                                                                                                                                                                                                                                                                        |                                                                                                                                                                                                                                                                                                                                                                           |                            |                                      |                                      |
|---------------------------------------------------------------------------------------------------------------------------------------------------------------------------------------------------------------------------------------------------------------------|----------------------------------------------------------------------------------------------------------------------------------------------------------------------------------------------------------------------------------------------------------------------------------|-----------------------------------------------------------------------------------------------------------------------------------------------------------------------------------------------------------------------------------------------------------------------------------------------------------------------------------------------------------------------------------------------------------------------------------------------------------------------------------------------------------------------------------------------------------------------|--------------------------------------------------------------------------------------------------------------------|------------------------------------------------------------------------------------------------------------------------------------------------------------------------------------------------------------------------------------------------------------------------------------------------------------------------|---------------------------------------------------------------------------------------------------------------------------------------------------------------------------------------------------------------------------------------------------------------------------------------------------------------------------------------------------------------------------|----------------------------|--------------------------------------|--------------------------------------|
| <div> <div> <div></div> <div></div> </div> <div> <div></div> <div></div> </div> <div> <div></div> <div></div> </div> </div>                                                                                                                                         | 1. Generic name                                                                                                                                                                                                                                                                  | 2. Strength                                                                                                                                                                                                                                                                                                                                                                                                                                                                                                                                                           | 3. Dosage form                                                                                                     | 4. Brand name                                                                                                                                                                                                                                                                                                          | 5. Manufacturer                                                                                                                                                                                                                                                                                                                                                           | 5a. Country of manufacture | 6. Is this antimalarial expired?     |                                      |
|                                                                                                                                                                                                                                                                     | <div> <div></div> <div></div> </div>                                                                                                                                                                                                                                             | <div> <div></div> <div></div> <div></div> </div>                                                                                                                                                                                                                                                                                                                                                                                                                                                                                                                      | <div> <div></div> <div></div> <div></div> </div>                                                                   | <div> <div></div> <div></div> <div></div> </div>                                                                                                                                                                                                                                                                       |                                                                                                                                                                                                                                                                                                                                                                           |                            | <div> <div></div> <div></div> </div> | <div> <div></div> <div></div> </div> |
|                                                                                                                                                                                                                                                                     | Do not write here                                                                                                                                                                                                                                                                |                                                                                                                                                                                                                                                                                                                                                                                                                                                                                                                                                                       |                                                                                                                    |                                                                                                                                                                                                                                                                                                                        |                                                                                                                                                                                                                                                                                                                                                                           |                            | Do not write here                    |                                      |
| <b>7. Package size</b><br><i>(Fill in number)</i><br><br>There are a total of<br><br><div> <div></div> <div></div> <div></div> <div></div> </div> tablets /<br>suppositories /<br>granule packs in<br>each <i>(circle type)</i> :<br><br>1 = Package<br>2 = Pot/tin | <b>8. Quantity in stock</b><br><i>(Record total # of packages or tins described in Q7)</i><br><br>There are a total of<br><br><div> <div></div> <div></div> <div></div> <div></div> </div> packages / tins /<br>granule packs of<br>this antimalarial in<br>stock at this outlet | <b>9. Amount sold/distributed in the last 7 days to individual consumers</b> <i>(Record # of packages or tins described in Q7 OR record the total # of tablets / suppositories / granule packs sold)</i><br><br>This outlet sold/distributed <div> <div></div> <div></div> <div></div> </div> packages or tins in the <u>last 7 days</u><br>OR<br><br>Outlet sold/distributed <div> <div></div> <div></div> <div></div> <div></div> </div> tablets, suppositories or granule packs in the <u>last 7 days</u><br><br><b>N/A = 995; Refused = 997; Don't know = 998</b> | <b>10a. Has this AM been stocked out in the past 3 months?</b><br><br>1 = Yes<br><br>0 = No<br><br>99 = Don't know | <b>11. Retail selling price</b><br><br><div> <div></div> <div></div> </div> tablets, suppositories or granule packs cost an individual customer<br><br><div> <div></div> <div></div> <div></div> <div></div> <div></div> </div> KW<br><br><b>Free = 00000;</b><br><b>Refused = 99997;</b><br><b>Don't know = 99998</b> | <b>12. Wholesale purchase price</b><br><i>For the outlet's most recent wholesale purchase</i><br><br><div> <div></div> <div></div> <div></div> <div></div> </div> tablets, suppositories or granule packs cost<br><br><div> <div></div> <div></div> <div></div> <div></div> </div> KW<br><br><b>Free = 00000;</b><br><b>Refused = 99997;</b><br><b>Don't know = 99998</b> | <b>13. Comments</b>        |                                      |                                      |

|                                                                                                                                                                                                                                                                     |                                                                                                                                                                                                                                                                                  |                                                                                                                                                                                                                                                                                                                                                                                                                                                                                                                                                                                   |                                                                                                                    |                                                                                                                                                                                                                                                                                                                                    |                                                                                                                                                                                                                                                                                                                                                                           |                     |                                                                   |                                  |  |
|---------------------------------------------------------------------------------------------------------------------------------------------------------------------------------------------------------------------------------------------------------------------|----------------------------------------------------------------------------------------------------------------------------------------------------------------------------------------------------------------------------------------------------------------------------------|-----------------------------------------------------------------------------------------------------------------------------------------------------------------------------------------------------------------------------------------------------------------------------------------------------------------------------------------------------------------------------------------------------------------------------------------------------------------------------------------------------------------------------------------------------------------------------------|--------------------------------------------------------------------------------------------------------------------|------------------------------------------------------------------------------------------------------------------------------------------------------------------------------------------------------------------------------------------------------------------------------------------------------------------------------------|---------------------------------------------------------------------------------------------------------------------------------------------------------------------------------------------------------------------------------------------------------------------------------------------------------------------------------------------------------------------------|---------------------|-------------------------------------------------------------------|----------------------------------|--|
| <div> <div> <div></div> <div></div> </div> <div> <div></div> <div></div> </div> <div> <div></div> <div></div> </div> </div>                                                                                                                                         | 1. Generic name                                                                                                                                                                                                                                                                  | 2. Strength                                                                                                                                                                                                                                                                                                                                                                                                                                                                                                                                                                       | 3. Dosage form                                                                                                     | 4. Brand name                                                                                                                                                                                                                                                                                                                      |                                                                                                                                                                                                                                                                                                                                                                           | 5. Manufacturer     | 5a. Country of manufacture                                        | 6. Is this antimalarial expired? |  |
|                                                                                                                                                                                                                                                                     |                                                                                                                                                                                                                                                                                  |                                                                                                                                                                                                                                                                                                                                                                                                                                                                                                                                                                                   |                                                                                                                    |                                                                                                                                                                                                                                                                                                                                    |                                                                                                                                                                                                                                                                                                                                                                           |                     |                                                                   |                                  |  |
|                                                                                                                                                                                                                                                                     |                                                                                                                                                                                                                                                                                  |                                                                                                                                                                                                                                                                                                                                                                                                                                                                                                                                                                                   |                                                                                                                    |                                                                                                                                                                                                                                                                                                                                    |                                                                                                                                                                                                                                                                                                                                                                           |                     |                                                                   |                                  |  |
| <div> <div></div> <div></div> </div> <div>Do not write here</div>                                                                                                                                                                                                   |                                                                                                                                                                                                                                                                                  |                                                                                                                                                                                                                                                                                                                                                                                                                                                                                                                                                                                   |                                                                                                                    |                                                                                                                                                                                                                                                                                                                                    |                                                                                                                                                                                                                                                                                                                                                                           |                     | <div> <div></div> <div></div> </div> <div>Do not write here</div> |                                  |  |
| <b>7. Package size</b><br><i>(Fill in number)</i><br><br>There are a total of<br><br><div> <div></div> <div></div> <div></div> <div></div> </div> tablets /<br>suppositories /<br>granule packs in<br>each <i>(circle type)</i> :<br><br>1 = Package<br>2 = Pot/tin | <b>8. Quantity in stock</b><br><i>(Record total # of packages or tins described in Q7)</i><br><br>There are a total of<br><br><div> <div></div> <div></div> <div></div> <div></div> </div> packages / tins /<br>granule packs of<br>this antimalarial in<br>stock at this outlet | <b>9. Amount sold/distributed in the last 7 days to individual consumers</b> <i>(Record # of packages or tins described in Q7 OR record the total # of tablets / suppositories / granule packs sold)</i><br><br>This outlet sold/distributed <div> <div></div> <div></div> <div></div> <div></div> </div> packages or tins in the <u>last 7 days</u><br>OR<br><br>Outlet sold/distributed <div> <div></div> <div></div> <div></div> <div></div> </div> tablets, suppositories or granule packs in the <u>last 7 days</u><br><br><b>N/A = 995; Refused = 997; Don't know = 998</b> | <b>10a. Has this AM been stocked out in the past 3 months?</b><br><br>1 = Yes<br><br>0 = No<br><br>99 = Don't know | <b>11. Retail selling price</b><br><br><div> <div></div> <div></div> </div> tablets, suppositories or granule packs cost an individual customer<br><br><div> <div></div> <div></div> <div></div> <div></div> <div></div> <div></div> </div> KW<br><br><b>Free = 00000;</b><br><b>Refused = 99997;</b><br><b>Don't know = 99998</b> | <b>12. Wholesale purchase price</b><br><i>For the outlet's most recent wholesale purchase</i><br><br><div> <div></div> <div></div> <div></div> <div></div> </div> tablets, suppositories or granule packs cost<br><br><div> <div></div> <div></div> <div></div> <div></div> </div> KW<br><br><b>Free = 00000;</b><br><b>Refused = 99997;</b><br><b>Don't know = 99998</b> | <b>13. Comments</b> |                                                                   |                                  |  |

**TABLET, SUPPOSITORY & GRANULE DRUG AUDIT SHEET (TSG)**

[ ]-[ ]-[ ]-[ ]-[ ]-[ ]-[ ]-[ ]-[ ]-[ ]-[ ]

|                                                                                                                                                                                                    |                        |                                                                                                                                                                                                                                   |                    |                                                                                                                                                                                                                                                                                                                                                                                                                                                                          |                       |                                                                                                            |                      |                                                                                                                                                                                                                          |                        |                                                                                                                                                                                                                                                                          |                                   |                          |                                         |                 |  |
|----------------------------------------------------------------------------------------------------------------------------------------------------------------------------------------------------|------------------------|-----------------------------------------------------------------------------------------------------------------------------------------------------------------------------------------------------------------------------------|--------------------|--------------------------------------------------------------------------------------------------------------------------------------------------------------------------------------------------------------------------------------------------------------------------------------------------------------------------------------------------------------------------------------------------------------------------------------------------------------------------|-----------------------|------------------------------------------------------------------------------------------------------------|----------------------|--------------------------------------------------------------------------------------------------------------------------------------------------------------------------------------------------------------------------|------------------------|--------------------------------------------------------------------------------------------------------------------------------------------------------------------------------------------------------------------------------------------------------------------------|-----------------------------------|--------------------------|-----------------------------------------|-----------------|--|
| [ ]<br>[ ]<br>[ ]                                                                                                                                                                                  | <b>1. Generic name</b> |                                                                                                                                                                                                                                   | <b>2. Strength</b> |                                                                                                                                                                                                                                                                                                                                                                                                                                                                          | <b>3. Dosage form</b> |                                                                                                            | <b>4. Brand name</b> |                                                                                                                                                                                                                          | <b>5. Manufacturer</b> |                                                                                                                                                                                                                                                                          | <b>5a. Country of manufacture</b> |                          | <b>6. Is this antimalarial expired?</b> |                 |  |
|                                                                                                                                                                                                    |                        |                                                                                                                                                                                                                                   | [ ]-[ ]-[ ]-[ ]mg  |                                                                                                                                                                                                                                                                                                                                                                                                                                                                          | 1 = Tablet            |                                                                                                            |                      |                                                                                                                                                                                                                          |                        |                                                                                                                                                                                                                                                                          |                                   |                          | 1 = Yes                                 |                 |  |
|                                                                                                                                                                                                    |                        |                                                                                                                                                                                                                                   | [ ]-[ ]-[ ]-[ ]mg  |                                                                                                                                                                                                                                                                                                                                                                                                                                                                          | 2 = Suppository       |                                                                                                            |                      |                                                                                                                                                                                                                          |                        |                                                                                                                                                                                                                                                                          |                                   |                          | 0 = No                                  |                 |  |
|                                                                                                                                                                                                    |                        |                                                                                                                                                                                                                                   |                    | [ ]-[ ]-[ ]-[ ]mg                                                                                                                                                                                                                                                                                                                                                                                                                                                        |                       | 3 = Granule                                                                                                |                      |                                                                                                                                                                                                                          |                        |                                                                                                                                                                                                                                                                          |                                   |                          |                                         | 99 = Don't know |  |
|                                                                                                                                                                                                    |                        | [ ]<br>Do not write here                                                                                                                                                                                                          |                    |                                                                                                                                                                                                                                                                                                                                                                                                                                                                          |                       |                                                                                                            |                      |                                                                                                                                                                                                                          |                        |                                                                                                                                                                                                                                                                          |                                   | [ ]<br>Do not write here |                                         |                 |  |
| <b>7. Package size</b><br>(Fill in number)<br><br>There are a total of<br>[ ]-[ ]-[ ]-[ ]<br>tablets /<br>suppositories /<br>granule packs in<br>each (circle type):<br>1 = Package<br>2 = Pot/tin |                        | <b>8. Quantity in stock</b><br>(Record total # of<br>packages or tins<br>described in Q7)<br><br>There are a total of<br>[ ]-[ ]-[ ]-[ ]<br>packages / tins /<br>granule packs of<br>this antimalarial in<br>stock at this outlet |                    | <b>9. Amount sold/distributed in the last 7 days to individual consumers</b> (Record # of packages or tins described in Q7 OR record the total # of tablets / suppositories / granule packs sold)<br><br>This outlet sold/distributed [ ]-[ ]-[ ]-[ ] packages or tins in the <u>last 7 days</u><br>OR<br>Outlet sold/distributed [ ]-[ ]-[ ]-[ ] tablets, suppositories or granule packs in the <u>last 7 days</u><br><b>N/A = 995; Refused = 997; Don't know = 998</b> |                       | <b>10a. Has this AM been stocked out in the past 3 months?</b><br><br>1 = Yes<br>0 = No<br>99 = Don't know |                      | <b>11. Retail selling price</b><br><br>[ ]-[ ] tablets,<br>suppositories or granule<br>packs cost an individual<br>customer<br><br>[ ]-[ ]-[ ]-[ ]KW<br><b>Free = 00000;<br/>Refused = 99997;<br/>Don't know = 99998</b> |                        | <b>12. Wholesale purchase price</b><br><i>For the outlet's most recent<br/>wholesale purchase</i><br><br>[ ]-[ ]-[ ]-[ ] tablets,<br>suppositories or granule packs<br>cost<br><br>[ ]-[ ]-[ ]-[ ]KW<br><b>Free = 00000;<br/>Refused = 99997;<br/>Don't know = 99998</b> |                                   | <b>13. Comments</b>      |                                         |                 |  |



[ | ]- [ | ]- [ | ]- [ | ]- [ | ]

|                                                                                                                                                                                    |                   |                                                                                                                                                                                                    |                                    |                                                                                                                                                                                                                                                    |                                                                                                             |                                                                                                             |               |                                                                                                                                                                                                                  |                 |                                                                                                                                                                                                                                                             |                            |              |                                              |  |
|------------------------------------------------------------------------------------------------------------------------------------------------------------------------------------|-------------------|----------------------------------------------------------------------------------------------------------------------------------------------------------------------------------------------------|------------------------------------|----------------------------------------------------------------------------------------------------------------------------------------------------------------------------------------------------------------------------------------------------|-------------------------------------------------------------------------------------------------------------|-------------------------------------------------------------------------------------------------------------|---------------|------------------------------------------------------------------------------------------------------------------------------------------------------------------------------------------------------------------|-----------------|-------------------------------------------------------------------------------------------------------------------------------------------------------------------------------------------------------------------------------------------------------------|----------------------------|--------------|----------------------------------------------|--|
| <div> <div></div> <div></div> <div></div> </div>                                                                                                                                   | 1. Generic name   |                                                                                                                                                                                                    | 2. Strength                        |                                                                                                                                                                                                                                                    | 3. Dosage form                                                                                              |                                                                                                             | 4. Brand name |                                                                                                                                                                                                                  | 5. Manufacturer |                                                                                                                                                                                                                                                             | 5a. Country of manufacture |              | 6. Is this antimalarial expired?             |  |
|                                                                                                                                                                                    |                   |                                                                                                                                                                                                    |                                    |                                                                                                                                                                                                                                                    | 4 = Syrup<br>5 = Suspension<br>6 = Liquid Injection<br>7 = Powder injection<br>8 = Other ( <i>specify</i> ) |                                                                                                             |               |                                                                                                                                                                                                                  |                 |                                                                                                                                                                                                                                                             |                            |              | 1 = Yes<br><br>0 = No<br><br>99 = Don't Know |  |
|                                                                                                                                                                                    |                   |                                                                                                                                                                                                    |                                    |                                                                                                                                                                                                                                                    |                                                                                                             |                                                                                                             |               |                                                                                                                                                                                                                  |                 |                                                                                                                                                                                                                                                             |                            |              |                                              |  |
|                                                                                                                                                                                    | Do not write here |                                                                                                                                                                                                    | (Note: no mL recorded for powders) |                                                                                                                                                                                                                                                    |                                                                                                             |                                                                                                             |               |                                                                                                                                                                                                                  |                 |                                                                                                                                                                                                                                                             | Do not write here          |              |                                              |  |
| 7. Package size<br>(Fill in number)<br><br>There are a total of<br><br>[ ] [ ] [ ] [ ] mL (or mg for powder injections) in each (circle type):<br>1 = Bottle<br>2 = Ampoule / Vial |                   | 8. Quantity in stock<br>(Record total # of bottles or ampoules described in Q7)<br><br>There are a total of<br><br>[ ] [ ] [ ] [ ] bottles / ampoules of this antimalarial in stock at this outlet |                                    | 9. Amount sold/distributed in the <u>last 7 days to individual consumers</u><br>This outlet sold/distributed<br><br>[ ] [ ] [ ] [ ] bottles, ampoules or vials in the <u>last 7 days</u><br><br><i>Refused = 9997;</i><br><i>Don't know = 9998</i> |                                                                                                             | 10a. Has this AM been stocked out in the past <u>3 months</u> ?<br><br>1 = Yes<br>0 = No<br>99 = Don't know |               | 10. Retail selling price<br><br>[ ] [ ] [ ] bottles, ampoules or vials cost an individual customer<br><br>[ ] [ ] [ ] [ ] KW<br><br><i>Free = 00000;</i><br><i>Refused = 99997;</i><br><i>Don't know = 99998</i> |                 | 11. Wholesale purchase price<br><i>For the outlet's most recent wholesale purchase</i><br><br>[ ] [ ] [ ] [ ] bottles, ampoules or vials cost<br><br>[ ] [ ] [ ] [ ] KW<br><br><i>Free = 00000;</i><br><i>Refused = 99997;</i><br><i>Don't know = 99998</i> |                            | 12. Comments |                                              |  |

|                                                                                                                                                                                    |                   |                                                                                                                                                                                                    |                                    |                                                                                                                                                                                                                                                    |                                                                                                             |                                                                                                             |               |                                                                                                                                                                                                                  |                 |                                                                                                                                                                                                                                                             |                            |              |                                              |  |
|------------------------------------------------------------------------------------------------------------------------------------------------------------------------------------|-------------------|----------------------------------------------------------------------------------------------------------------------------------------------------------------------------------------------------|------------------------------------|----------------------------------------------------------------------------------------------------------------------------------------------------------------------------------------------------------------------------------------------------|-------------------------------------------------------------------------------------------------------------|-------------------------------------------------------------------------------------------------------------|---------------|------------------------------------------------------------------------------------------------------------------------------------------------------------------------------------------------------------------|-----------------|-------------------------------------------------------------------------------------------------------------------------------------------------------------------------------------------------------------------------------------------------------------|----------------------------|--------------|----------------------------------------------|--|
| <div> <div></div> <div></div> <div></div> </div>                                                                                                                                   | 1. Generic name   |                                                                                                                                                                                                    | 2. Strength                        |                                                                                                                                                                                                                                                    | 3. Dosage form                                                                                              |                                                                                                             | 4. Brand name |                                                                                                                                                                                                                  | 5. Manufacturer |                                                                                                                                                                                                                                                             | 5a. Country of manufacture |              | 6. Is this antimalarial expired?             |  |
|                                                                                                                                                                                    |                   |                                                                                                                                                                                                    |                                    |                                                                                                                                                                                                                                                    | 4 = Syrup<br>5 = Suspension<br>6 = Liquid Injection<br>7 = Powder injection<br>8 = Other ( <i>specify</i> ) |                                                                                                             |               |                                                                                                                                                                                                                  |                 |                                                                                                                                                                                                                                                             |                            |              | 1 = Yes<br><br>0 = No<br><br>99 = Don't Know |  |
|                                                                                                                                                                                    |                   |                                                                                                                                                                                                    |                                    |                                                                                                                                                                                                                                                    |                                                                                                             |                                                                                                             |               |                                                                                                                                                                                                                  |                 |                                                                                                                                                                                                                                                             |                            |              |                                              |  |
|                                                                                                                                                                                    | Do not write here |                                                                                                                                                                                                    | (Note: no mL recorded for powders) |                                                                                                                                                                                                                                                    |                                                                                                             |                                                                                                             |               |                                                                                                                                                                                                                  |                 |                                                                                                                                                                                                                                                             | Do not write here          |              |                                              |  |
| 7. Package size<br>(Fill in number)<br><br>There are a total of<br><br>[ ] [ ] [ ] [ ] mL (or mg for powder injections) in each (circle type):<br>1 = Bottle<br>2 = Ampoule / Vial |                   | 8. Quantity in stock<br>(Record total # of bottles or ampoules described in Q7)<br><br>There are a total of<br><br>[ ] [ ] [ ] [ ] bottles / ampoules of this antimalarial in stock at this outlet |                                    | 9. Amount sold/distributed in the <u>last 7 days to individual consumers</u><br>This outlet sold/distributed<br><br>[ ] [ ] [ ] [ ] bottles, ampoules or vials in the <u>last 7 days</u><br><br><i>Refused = 9997;</i><br><i>Don't know = 9998</i> |                                                                                                             | 10a. Has this AM been stocked out in the past <u>3 months</u> ?<br><br>1 = Yes<br>0 = No<br>99 = Don't know |               | 10. Retail selling price<br><br>[ ] [ ] [ ] bottles, ampoules or vials cost an individual customer<br><br>[ ] [ ] [ ] [ ] KW<br><br><i>Free = 00000;</i><br><i>Refused = 99997;</i><br><i>Don't know = 99998</i> |                 | 11. Wholesale purchase price<br><i>For the outlet's most recent wholesale purchase</i><br><br>[ ] [ ] [ ] [ ] bottles, ampoules or vials cost<br><br>[ ] [ ] [ ] [ ] KW<br><br><i>Free = 00000;</i><br><i>Refused = 99997;</i><br><i>Don't know = 99998</i> |                            | 12. Comments |                                              |  |

[ | ]- [ | ]- [ | ]- [ | ]- [ | ]

|                                                                                                                                  |                                                                                                      |                                                                                                                                                   |                                                                 |                                                                                                                                                                  |                                                                                                                                               |                                  |                                  |
|----------------------------------------------------------------------------------------------------------------------------------|------------------------------------------------------------------------------------------------------|---------------------------------------------------------------------------------------------------------------------------------------------------|-----------------------------------------------------------------|------------------------------------------------------------------------------------------------------------------------------------------------------------------|-----------------------------------------------------------------------------------------------------------------------------------------------|----------------------------------|----------------------------------|
|                                                                                                                                  | 1. Generic name                                                                                      | 2. Strength                                                                                                                                       | 3. Dosage form                                                  | 4. Brand name                                                                                                                                                    | 5. Manufacturer                                                                                                                               | 5a. Country of manufacture       | 6. Is this antimalarial expired? |
| [ ] [ ]                                                                                                                          |                                                                                                      | [ ] [ ] [ ] [ ]. [ ] mg/[ ] [ ] [ ] mL                                                                                                            | 4 = Syrup                                                       |                                                                                                                                                                  |                                                                                                                                               |                                  | 1 = Yes                          |
| [ ] [ ]                                                                                                                          |                                                                                                      | [ ] [ ] [ ] [ ]. [ ] mg/[ ] [ ] [ ] mL                                                                                                            | 5 = Suspension                                                  |                                                                                                                                                                  |                                                                                                                                               |                                  | 0 = No                           |
| [ ] [ ]                                                                                                                          |                                                                                                      | [ ] [ ] [ ] [ ]. [ ] mg/[ ] [ ] [ ] mL                                                                                                            | 6 = Liquid Injection                                            |                                                                                                                                                                  |                                                                                                                                               |                                  | 99 = Don't Know                  |
|                                                                                                                                  | [ ] [ ]<br>Do not write here                                                                         | (Note: no mL recorded for powders)                                                                                                                | 7 = Powder injection                                            |                                                                                                                                                                  |                                                                                                                                               | [ ] [ ] [ ]<br>Do not write here |                                  |
|                                                                                                                                  |                                                                                                      | 8 = Other ( <i>specify</i> )                                                                                                                      |                                                                 |                                                                                                                                                                  |                                                                                                                                               |                                  |                                  |
| 7. Package size<br>(Fill in number)                                                                                              | 8. Quantity in stock<br>(Record total # of bottles or ampoules described in Q7)                      | 9. Amount sold/distributed in the <u>last 7 days to individual consumers</u>                                                                      | 10a. Has this AM been stocked out in the past <u>3 months</u> ? | 10. Retail selling price                                                                                                                                         | 11. Wholesale purchase price<br>For the outlet's most recent wholesale purchase                                                               | 12. Comments                     |                                  |
| There are a total of [ ] [ ] [ ] [ ] mL (or mg for powder injections) in each (circle type):<br>1 = Bottle<br>2 = Ampoule / Vial | There are a total of [ ] [ ] [ ] [ ] bottles / ampoules of this antimalarial in stock at this outlet | This outlet sold/distributed [ ] [ ] [ ] [ ] bottles, ampoules or vials in the <u>last 7 days</u><br><i>Refused = 9997;<br/>Don't know = 9998</i> | 1 = Yes<br>0 = No<br>99 = Don't know                            | [ ] [ ] [ ] bottles, ampoules or vials cost an individual customer<br>[ ] [ ] [ ] [ ] [ ] KW<br><i>Free = 00000;<br/>Refused = 99997;<br/>Don't know = 99998</i> | [ ] [ ] [ ] [ ] bottles, ampoules or vials cost<br>[ ] [ ] [ ] [ ] [ ] KW<br><i>Free = 00000;<br/>Refused = 99997;<br/>Don't know = 99998</i> |                                  |                                  |

|                                                                                                                                  |                                                                                                      |                                                                                                                                                   |                                                                 |                                                                                                                                                                  |                                                                                                                                               |                                  |                                  |
|----------------------------------------------------------------------------------------------------------------------------------|------------------------------------------------------------------------------------------------------|---------------------------------------------------------------------------------------------------------------------------------------------------|-----------------------------------------------------------------|------------------------------------------------------------------------------------------------------------------------------------------------------------------|-----------------------------------------------------------------------------------------------------------------------------------------------|----------------------------------|----------------------------------|
|                                                                                                                                  | 1. Generic name                                                                                      | 2. Strength                                                                                                                                       | 3. Dosage form                                                  | 4. Brand name                                                                                                                                                    | 5. Manufacturer                                                                                                                               | 5a. Country of manufacture       | 6. Is this antimalarial expired? |
| [ ] [ ]                                                                                                                          |                                                                                                      | [ ] [ ] [ ] [ ]. [ ] mg/[ ] [ ] [ ] mL                                                                                                            | 4 = Syrup                                                       |                                                                                                                                                                  |                                                                                                                                               |                                  | 1 = Yes                          |
| [ ] [ ]                                                                                                                          |                                                                                                      | [ ] [ ] [ ] [ ]. [ ] mg/[ ] [ ] [ ] mL                                                                                                            | 5 = Suspension                                                  |                                                                                                                                                                  |                                                                                                                                               |                                  | 0 = No                           |
| [ ] [ ]                                                                                                                          |                                                                                                      | [ ] [ ] [ ] [ ]. [ ] mg/[ ] [ ] [ ] mL                                                                                                            | 6 = Liquid Injection                                            |                                                                                                                                                                  |                                                                                                                                               |                                  | 99 = Don't Know                  |
|                                                                                                                                  | [ ] [ ]<br>Do not write here                                                                         | (Note: no mL recorded for powders)                                                                                                                | 7 = Powder injection                                            |                                                                                                                                                                  |                                                                                                                                               | [ ] [ ] [ ]<br>Do not write here |                                  |
|                                                                                                                                  |                                                                                                      |                                                                                                                                                   | 8 = Other ( <i>specify</i> )                                    |                                                                                                                                                                  |                                                                                                                                               |                                  |                                  |
| 7. Package size<br>(Fill in number)                                                                                              | 8. Quantity in stock<br>(Record total # of bottles or ampoules described in Q7)                      | 9. Amount sold/distributed in the <u>last 7 days to individual consumers</u>                                                                      | 10a. Has this AM been stocked out in the past <u>3 months</u> ? | 10. Retail selling price                                                                                                                                         | 11. Wholesale purchase price<br>For the outlet's most recent wholesale purchase                                                               | 12. Comments                     |                                  |
| There are a total of [ ] [ ] [ ] [ ] mL (or mg for powder injections) in each (circle type):<br>1 = Bottle<br>2 = Ampoule / Vial | There are a total of [ ] [ ] [ ] [ ] bottles / ampoules of this antimalarial in stock at this outlet | This outlet sold/distributed [ ] [ ] [ ] [ ] bottles, ampoules or vials in the <u>last 7 days</u><br><i>Refused = 9997;<br/>Don't know = 9998</i> | 1 = Yes<br>0 = No<br>99 = Don't know                            | [ ] [ ] [ ] bottles, ampoules or vials cost an individual customer<br>[ ] [ ] [ ] [ ] [ ] KW<br><i>Free = 00000;<br/>Refused = 99997;<br/>Don't know = 99998</i> | [ ] [ ] [ ] [ ] bottles, ampoules or vials cost<br>[ ] [ ] [ ] [ ] [ ] KW<br><i>Free = 00000;<br/>Refused = 99997;<br/>Don't know = 99998</i> |                                  |                                  |

[ | ]- [ | ]- [ | ]- [ | ]-

|                                                                                           |                                                                                                   |                                                                                                |                                                                 |                                                                                                                                                                                   |                                                                                                                                                               |                                                        |                                  |
|-------------------------------------------------------------------------------------------|---------------------------------------------------------------------------------------------------|------------------------------------------------------------------------------------------------|-----------------------------------------------------------------|-----------------------------------------------------------------------------------------------------------------------------------------------------------------------------------|---------------------------------------------------------------------------------------------------------------------------------------------------------------|--------------------------------------------------------|----------------------------------|
| <div> <div></div> <div></div> <div></div> </div>                                          | 1. Generic name                                                                                   | 2. Strength                                                                                    | 3. Dosage form                                                  | 4. Brand name                                                                                                                                                                     | 5. Manufacturer                                                                                                                                               | 5a. Country of manufacture                             | 6. Is this antimalarial expired? |
|                                                                                           |                                                                                                   | [ ][ ][ ][ ] . [ ] mg / [ ][ ][ ] mL                                                           | 4 = Syrup                                                       |                                                                                                                                                                                   |                                                                                                                                                               |                                                        | 1 = Yes                          |
|                                                                                           |                                                                                                   | [ ][ ][ ][ ] . [ ] mg / [ ][ ][ ] mL                                                           | 5 = Suspension                                                  |                                                                                                                                                                                   |                                                                                                                                                               |                                                        | 0 = No                           |
|                                                                                           |                                                                                                   | [ ][ ][ ][ ] . [ ] mg / [ ][ ][ ] mL                                                           | 6 = Liquid Injection                                            |                                                                                                                                                                                   |                                                                                                                                                               |                                                        | 99 = Don't Know                  |
| <div> <div></div> <div></div> </div> Do not write here                                    |                                                                                                   | (Note: no mL recorded for powders)                                                             |                                                                 | 7 = Powder injection                                                                                                                                                              |                                                                                                                                                               | <div> <div></div> <div></div> </div> Do not write here |                                  |
| 7. Package size<br>(Fill in number)                                                       | 8. Quantity in stock<br>(Record total # of bottles or ampoules described in Q7)                   | 9. Amount sold/distributed in the <u>last 7 days to individual consumers</u>                   | 10a. Has this AM been stocked out in the past <u>3 months</u> ? | 10. Retail selling price                                                                                                                                                          | 11. Wholesale purchase price<br>For the outlet's most recent wholesale purchase                                                                               | 12. Comments                                           |                                  |
| There are a total of [ ][ ][ ][ ] mL (or mg for powder injections) in each (circle type): | There are a total of [ ][ ][ ][ ] bottles / ampoules of this antimalarial in stock at this outlet | This outlet sold/distributed [ ][ ][ ][ ] bottles, ampoules or vials in the <u>last 7 days</u> | 1 = Yes<br>0 = No<br>99 = Don't know                            | [ ][ ][ ][ ] bottles, ampoules or vials cost an individual customer<br><br>[ ][ ][ ][ ][ ] KW<br><br><b>Free = 00000;</b><br><b>Refused = 99997;</b><br><b>Don't know = 99998</b> | [ ][ ][ ][ ][ ] bottles, ampoules or vials cost<br><br>[ ][ ][ ][ ][ ] KW<br><br><b>Free = 00000;</b><br><b>Refused = 99997;</b><br><b>Don't know = 99998</b> |                                                        |                                  |
| 1 = Bottle<br>2 = Ampoule / Vial                                                          |                                                                                                   | <b>Refused = 9997;</b><br><b>Don't know = 9998</b>                                             |                                                                 |                                                                                                                                                                                   |                                                                                                                                                               |                                                        |                                  |

|                                                                                           |                                                                                                   |                                                                                                |                                                                 |                                                                                                                                                                                   |                                                                                                                                                               |                                                        |                                  |
|-------------------------------------------------------------------------------------------|---------------------------------------------------------------------------------------------------|------------------------------------------------------------------------------------------------|-----------------------------------------------------------------|-----------------------------------------------------------------------------------------------------------------------------------------------------------------------------------|---------------------------------------------------------------------------------------------------------------------------------------------------------------|--------------------------------------------------------|----------------------------------|
| <div> <div></div> <div></div> <div></div> </div>                                          | 1. Generic name                                                                                   | 2. Strength                                                                                    | 3. Dosage form                                                  | 4. Brand name                                                                                                                                                                     | 5. Manufacturer                                                                                                                                               | 5a. Country of manufacture                             | 6. Is this antimalarial expired? |
|                                                                                           |                                                                                                   | [ ][ ][ ][ ] . [ ] mg / [ ][ ][ ] mL                                                           | 4 = Syrup                                                       |                                                                                                                                                                                   |                                                                                                                                                               |                                                        | 1 = Yes                          |
|                                                                                           |                                                                                                   | [ ][ ][ ][ ] . [ ] mg / [ ][ ][ ] mL                                                           | 5 = Suspension                                                  |                                                                                                                                                                                   |                                                                                                                                                               |                                                        | 0 = No                           |
|                                                                                           |                                                                                                   | [ ][ ][ ][ ] . [ ] mg / [ ][ ][ ] mL                                                           | 6 = Liquid Injection                                            |                                                                                                                                                                                   |                                                                                                                                                               |                                                        | 99 = Don't Know                  |
| <div> <div></div> <div></div> </div> Do not write here                                    |                                                                                                   | (Note: no mL recorded for powders)                                                             |                                                                 | 7 = Powder injection                                                                                                                                                              |                                                                                                                                                               | <div> <div></div> <div></div> </div> Do not write here |                                  |
| 7. Package size<br>(Fill in number)                                                       | 8. Quantity in stock<br>(Record total # of bottles or ampoules described in Q7)                   | 9. Amount sold/distributed in the <u>last 7 days to individual consumers</u>                   | 10a. Has this AM been stocked out in the past <u>3 months</u> ? | 10. Retail selling price                                                                                                                                                          | 11. Wholesale purchase price<br>For the outlet's most recent wholesale purchase                                                                               | 12. Comments                                           |                                  |
| There are a total of [ ][ ][ ][ ] mL (or mg for powder injections) in each (circle type): | There are a total of [ ][ ][ ][ ] bottles / ampoules of this antimalarial in stock at this outlet | This outlet sold/distributed [ ][ ][ ][ ] bottles, ampoules or vials in the <u>last 7 days</u> | 1 = Yes<br>0 = No<br>99 = Don't know                            | [ ][ ][ ][ ] bottles, ampoules or vials cost an individual customer<br><br>[ ][ ][ ][ ][ ] KW<br><br><b>Free = 00000;</b><br><b>Refused = 99997;</b><br><b>Don't know = 99998</b> | [ ][ ][ ][ ][ ] bottles, ampoules or vials cost<br><br>[ ][ ][ ][ ][ ] KW<br><br><b>Free = 00000;</b><br><b>Refused = 99997;</b><br><b>Don't know = 99998</b> |                                                        |                                  |
| 1 = Bottle<br>2 = Ampoule / Vial                                                          |                                                                                                   | <b>Refused = 9997;</b><br><b>Don't know = 9998</b>                                             |                                                                 |                                                                                                                                                                                   |                                                                                                                                                               |                                                        |                                  |

[ | ]- [ | ]- [ | ]- [ | ]-

|                                                                                                                               |                                                                                                   |                                                                                                                                                    |                                                                                                             |                                                                                                                                                                       |                                                                                                                                                   |                                                        |                                              |
|-------------------------------------------------------------------------------------------------------------------------------|---------------------------------------------------------------------------------------------------|----------------------------------------------------------------------------------------------------------------------------------------------------|-------------------------------------------------------------------------------------------------------------|-----------------------------------------------------------------------------------------------------------------------------------------------------------------------|---------------------------------------------------------------------------------------------------------------------------------------------------|--------------------------------------------------------|----------------------------------------------|
| <div> <div></div> <div></div> <div></div> </div>                                                                              | 1. Generic name                                                                                   | 2. Strength                                                                                                                                        | 3. Dosage form                                                                                              | 4. Brand name                                                                                                                                                         | 5. Manufacturer                                                                                                                                   | 5a. Country of manufacture                             | 6. Is this antimalarial expired?             |
|                                                                                                                               |                                                                                                   | [ ][ ][ ][ ] . [ ] mg / [ ][ ][ ] mL                                                                                                               | 4 = Syrup<br>5 = Suspension<br>6 = Liquid Injection<br>7 = Powder injection<br>8 = Other ( <i>specify</i> ) |                                                                                                                                                                       |                                                                                                                                                   |                                                        | 1 = Yes<br><br>0 = No<br><br>99 = Don't Know |
|                                                                                                                               |                                                                                                   | [ ][ ][ ][ ] . [ ] mg / [ ][ ][ ] mL                                                                                                               |                                                                                                             |                                                                                                                                                                       |                                                                                                                                                   |                                                        |                                              |
|                                                                                                                               |                                                                                                   | [ ][ ][ ][ ] . [ ] mg / [ ][ ][ ] mL                                                                                                               |                                                                                                             |                                                                                                                                                                       |                                                                                                                                                   |                                                        |                                              |
| <div> <div></div> <div></div> </div> Do not write here                                                                        |                                                                                                   | (Note: no mL recorded for powders)                                                                                                                 |                                                                                                             |                                                                                                                                                                       |                                                                                                                                                   | <div> <div></div> <div></div> </div> Do not write here |                                              |
| 7. Package size<br>(Fill in number)                                                                                           | 8. Quantity in stock<br>(Record total # of bottles or ampoules described in Q7)                   | 9. Amount sold/distributed in the <u>last 7 days to individual consumers</u>                                                                       | 10a. Has this AM been stocked out in the past <u>3 months</u> ?                                             | 10. Retail selling price                                                                                                                                              | 11. Wholesale purchase price<br><i>For the outlet's most recent wholesale purchase</i>                                                            | 12. Comments                                           |                                              |
| There are a total of [ ][ ][ ][ ] mL (or mg for powder injections) in each (circle type):<br>1 = Bottle<br>2 = Ampoule / Vial | There are a total of [ ][ ][ ][ ] bottles / ampoules of this antimalarial in stock at this outlet | This outlet sold/distributed [ ][ ][ ][ ] bottles, ampoules or vials in the <u>last 7 days</u><br><br><i>Refused = 9997;<br/>Don't know = 9998</i> | 1 = Yes<br>0 = No<br>99 = Don't know                                                                        | [ ][ ][ ][ ] bottles, ampoules or vials cost an individual customer<br><br>[ ][ ][ ][ ][ ] KW<br><br><i>Free = 00000;<br/>Refused = 99997;<br/>Don't know = 99998</i> | [ ][ ][ ][ ][ ] bottles, ampoules or vials cost<br><br>[ ][ ][ ][ ][ ] KW<br><br><i>Free = 00000;<br/>Refused = 99997;<br/>Don't know = 99998</i> |                                                        |                                              |

|                                                                                                                               |                                                                                                   |                                                                                                                                                    |                                                                                                             |                                                                                                                                                                       |                                                                                                                                                   |                                                        |                                              |
|-------------------------------------------------------------------------------------------------------------------------------|---------------------------------------------------------------------------------------------------|----------------------------------------------------------------------------------------------------------------------------------------------------|-------------------------------------------------------------------------------------------------------------|-----------------------------------------------------------------------------------------------------------------------------------------------------------------------|---------------------------------------------------------------------------------------------------------------------------------------------------|--------------------------------------------------------|----------------------------------------------|
| <div> <div></div> <div></div> <div></div> </div>                                                                              | 1. Generic name                                                                                   | 2. Strength                                                                                                                                        | 3. Dosage form                                                                                              | 4. Brand name                                                                                                                                                         | 5. Manufacturer                                                                                                                                   | 5a. Country of manufacture                             | 6. Is this antimalarial expired?             |
|                                                                                                                               |                                                                                                   | [ ][ ][ ][ ] . [ ] mg / [ ][ ][ ] mL                                                                                                               | 4 = Syrup<br>5 = Suspension<br>6 = Liquid Injection<br>7 = Powder injection<br>8 = Other ( <i>specify</i> ) |                                                                                                                                                                       |                                                                                                                                                   |                                                        | 1 = Yes<br><br>0 = No<br><br>99 = Don't Know |
|                                                                                                                               |                                                                                                   | [ ][ ][ ][ ] . [ ] mg / [ ][ ][ ] mL                                                                                                               |                                                                                                             |                                                                                                                                                                       |                                                                                                                                                   |                                                        |                                              |
|                                                                                                                               |                                                                                                   | [ ][ ][ ][ ] . [ ] mg / [ ][ ][ ] mL                                                                                                               |                                                                                                             |                                                                                                                                                                       |                                                                                                                                                   |                                                        |                                              |
| <div> <div></div> <div></div> </div> Do not write here                                                                        |                                                                                                   | (Note: no mL recorded for powders)                                                                                                                 |                                                                                                             |                                                                                                                                                                       |                                                                                                                                                   | <div> <div></div> <div></div> </div> Do not write here |                                              |
| 7. Package size<br>(Fill in number)                                                                                           | 8. Quantity in stock<br>(Record total # of bottles or ampoules described in Q7)                   | 9. Amount sold/distributed in the <u>last 7 days to individual consumers</u>                                                                       | 10a. Has this AM been stocked out in the past <u>3 months</u> ?                                             | 10. Retail selling price                                                                                                                                              | 11. Wholesale purchase price<br><i>For the outlet's most recent wholesale purchase</i>                                                            | 12. Comments                                           |                                              |
| There are a total of [ ][ ][ ][ ] mL (or mg for powder injections) in each (circle type):<br>1 = Bottle<br>2 = Ampoule / Vial | There are a total of [ ][ ][ ][ ] bottles / ampoules of this antimalarial in stock at this outlet | This outlet sold/distributed [ ][ ][ ][ ] bottles, ampoules or vials in the <u>last 7 days</u><br><br><i>Refused = 9997;<br/>Don't know = 9998</i> | 1 = Yes<br>0 = No<br>99 = Don't know                                                                        | [ ][ ][ ][ ] bottles, ampoules or vials cost an individual customer<br><br>[ ][ ][ ][ ][ ] KW<br><br><i>Free = 00000;<br/>Refused = 99997;<br/>Don't know = 99998</i> | [ ][ ][ ][ ][ ] bottles, ampoules or vials cost<br><br>[ ][ ][ ][ ][ ] KW<br><br><i>Free = 00000;<br/>Refused = 99997;<br/>Don't know = 99998</i> |                                                        |                                              |

# NON-TABLET DRUG AUDIT SHEET (NT)

----

|                                                                                                                                                                                                                                                                                                                                                          |  |                                                                                                                                                                                                                                                                                                                                                                                |  |                                                                                                                                                                                                                                                                                                                                                                                                                      |  |                                                                                                                                                                                                                                                                                            |  |                                                                                                                                                                                                                                                                                                                                                                                |  |                                                                                                                                                                                                                                                                                                                                                                                                                       |  |                                                                                                                                                                      |  |
|----------------------------------------------------------------------------------------------------------------------------------------------------------------------------------------------------------------------------------------------------------------------------------------------------------------------------------------------------------|--|--------------------------------------------------------------------------------------------------------------------------------------------------------------------------------------------------------------------------------------------------------------------------------------------------------------------------------------------------------------------------------|--|----------------------------------------------------------------------------------------------------------------------------------------------------------------------------------------------------------------------------------------------------------------------------------------------------------------------------------------------------------------------------------------------------------------------|--|--------------------------------------------------------------------------------------------------------------------------------------------------------------------------------------------------------------------------------------------------------------------------------------------|--|--------------------------------------------------------------------------------------------------------------------------------------------------------------------------------------------------------------------------------------------------------------------------------------------------------------------------------------------------------------------------------|--|-----------------------------------------------------------------------------------------------------------------------------------------------------------------------------------------------------------------------------------------------------------------------------------------------------------------------------------------------------------------------------------------------------------------------|--|----------------------------------------------------------------------------------------------------------------------------------------------------------------------|--|
| <div> <div><input type="text"/></div> <div><input type="text"/></div> <div><input type="text"/></div> <div><input type="text"/></div> </div> <div>Do not write here</div>                                                                                                                                                                                |  | <div> <div><input type="text"/></div> <div><input type="text"/></div> <div><input type="text"/></div> <div><input type="text"/></div> </div> <div>(Note: no mL recorded for powders)</div>                                                                                                                                                                                     |  | <div> <div><input type="text"/></div> <div><input type="text"/></div> <div><input type="text"/></div> <div><input type="text"/></div> </div> <div>4 = Syrup<br/>5 = Suspension<br/>6 = Liquid Injection<br/>7 = Powder injection<br/>8 = Other (<i>specify</i>)</div>                                                                                                                                                |  | <div> <div><input type="text"/></div> <div><input type="text"/></div> <div><input type="text"/></div> <div><input type="text"/></div> </div>                                                                                                                                               |  | <div> <div><input type="text"/></div> <div><input type="text"/></div> <div><input type="text"/></div> <div><input type="text"/></div> </div> <div>Do not write here</div>                                                                                                                                                                                                      |  | <div> <div><input type="text"/></div> <div><input type="text"/></div> <div><input type="text"/></div> <div><input type="text"/></div> </div> <div>1 = Yes<br/>0 = No<br/>99 = Don't Know</div>                                                                                                                                                                                                                        |  |                                                                                                                                                                      |  |
| <div> <div><input type="text"/></div> <div><input type="text"/></div> <div><input type="text"/></div> <div><input type="text"/></div> </div> <div>7. Package size<br/>(Fill in number)<br/>There are a total of<br/><input type="text"/> mL (or<br/>mg for powder<br/>injections) in each<br/>(circle type):<br/>1 = Bottle<br/>2 = Ampoule / Vial</div> |  | <div> <div><input type="text"/></div> <div><input type="text"/></div> <div><input type="text"/></div> <div><input type="text"/></div> </div> <div>8. Quantity in stock<br/>(Record total # of<br/>bottles or ampoules<br/>described in Q7)<br/>There are a total of<br/><input type="text"/><br/>bottles / ampoules of<br/>this antimalarial in<br/>stock at this outlet</div> |  | <div> <div><input type="text"/></div> <div><input type="text"/></div> <div><input type="text"/></div> <div><input type="text"/></div> </div> <div>9. Amount sold/distributed in<br/>the <u>last 7 days to individual<br/>consumers</u><br/>This outlet sold/distributed<br/><input type="text"/> bottles,<br/>ampoules or vials in the<br/><u>last 7 days</u><br/><i>Refused = 9997;<br/>Don't know = 9998</i></div> |  | <div> <div><input type="text"/></div> <div><input type="text"/></div> <div><input type="text"/></div> <div><input type="text"/></div> </div> <div>10a. Has this<br/>AM been<br/>stocked out<br/>in the past <u>3<br/>months</u>?<br/><br/>1 = Yes<br/>0 = No<br/>99 = Don't<br/>know</div> |  | <div> <div><input type="text"/></div> <div><input type="text"/></div> <div><input type="text"/></div> <div><input type="text"/></div> </div> <div>10. Retail selling price<br/><br/><input type="text"/> bottles, ampoules or<br/>vials cost an individual customer<br/><br/><input type="text"/>KW<br/><i>Free = 00000;<br/>Refused = 99997;<br/>Don't know = 99998</i></div> |  | <div> <div><input type="text"/></div> <div><input type="text"/></div> <div><input type="text"/></div> <div><input type="text"/></div> </div> <div>11. Wholesale purchase price<br/><i>For the outlet's most recent wholesale<br/>purchase</i><br/><input type="text"/> bottles, ampoules or<br/>vials cost<br/><br/><input type="text"/>KW<br/><i>Free = 00000;<br/>Refused = 99997;<br/>Don't know = 99998</i></div> |  | <div> <div><input type="text"/></div> <div><input type="text"/></div> <div><input type="text"/></div> <div><input type="text"/></div> </div> <div>12. Comments</div> |  |

|                                                                                                                                                                                                                                                                                                                                                          |  |                                                                                                                                                                                                                                                                                                                                                                                |  |                                                                                                                                                                                                                                                                                                                                                                                                                      |  |                                                                                                                                                                                                                                                                                            |  |                                                                                                                                                                                                                                                                                                                                                                                |  |                                                                                                                                                                                                                                                                                                                                                                                                                       |  |                                                                                                                                                                      |  |
|----------------------------------------------------------------------------------------------------------------------------------------------------------------------------------------------------------------------------------------------------------------------------------------------------------------------------------------------------------|--|--------------------------------------------------------------------------------------------------------------------------------------------------------------------------------------------------------------------------------------------------------------------------------------------------------------------------------------------------------------------------------|--|----------------------------------------------------------------------------------------------------------------------------------------------------------------------------------------------------------------------------------------------------------------------------------------------------------------------------------------------------------------------------------------------------------------------|--|--------------------------------------------------------------------------------------------------------------------------------------------------------------------------------------------------------------------------------------------------------------------------------------------|--|--------------------------------------------------------------------------------------------------------------------------------------------------------------------------------------------------------------------------------------------------------------------------------------------------------------------------------------------------------------------------------|--|-----------------------------------------------------------------------------------------------------------------------------------------------------------------------------------------------------------------------------------------------------------------------------------------------------------------------------------------------------------------------------------------------------------------------|--|----------------------------------------------------------------------------------------------------------------------------------------------------------------------|--|
| <div> <div><input type="text"/></div> <div><input type="text"/></div> <div><input type="text"/></div> <div><input type="text"/></div> </div> <div>Do not write here</div>                                                                                                                                                                                |  | <div> <div><input type="text"/></div> <div><input type="text"/></div> <div><input type="text"/></div> <div><input type="text"/></div> </div> <div>(Note: no mL recorded for powders)</div>                                                                                                                                                                                     |  | <div> <div><input type="text"/></div> <div><input type="text"/></div> <div><input type="text"/></div> <div><input type="text"/></div> </div> <div>4 = Syrup<br/>5 = Suspension<br/>6 = Liquid Injection<br/>7 = Powder injection<br/>8 = Other (<i>specify</i>)</div>                                                                                                                                                |  | <div> <div><input type="text"/></div> <div><input type="text"/></div> <div><input type="text"/></div> <div><input type="text"/></div> </div>                                                                                                                                               |  | <div> <div><input type="text"/></div> <div><input type="text"/></div> <div><input type="text"/></div> <div><input type="text"/></div> </div> <div>Do not write here</div>                                                                                                                                                                                                      |  | <div> <div><input type="text"/></div> <div><input type="text"/></div> <div><input type="text"/></div> <div><input type="text"/></div> </div> <div>1 = Yes<br/>0 = No<br/>99 = Don't<br/>Know</div>                                                                                                                                                                                                                    |  |                                                                                                                                                                      |  |
| <div> <div><input type="text"/></div> <div><input type="text"/></div> <div><input type="text"/></div> <div><input type="text"/></div> </div> <div>7. Package size<br/>(Fill in number)<br/>There are a total of<br/><input type="text"/> mL (or<br/>mg for powder<br/>injections) in each<br/>(circle type):<br/>1 = Bottle<br/>2 = Ampoule / Vial</div> |  | <div> <div><input type="text"/></div> <div><input type="text"/></div> <div><input type="text"/></div> <div><input type="text"/></div> </div> <div>8. Quantity in stock<br/>(Record total # of<br/>bottles or ampoules<br/>described in Q7)<br/>There are a total of<br/><input type="text"/><br/>bottles / ampoules of<br/>this antimalarial in<br/>stock at this outlet</div> |  | <div> <div><input type="text"/></div> <div><input type="text"/></div> <div><input type="text"/></div> <div><input type="text"/></div> </div> <div>9. Amount sold/distributed in<br/>the <u>last 7 days to individual<br/>consumers</u><br/>This outlet sold/distributed<br/><input type="text"/> bottles,<br/>ampoules or vials in the<br/><u>last 7 days</u><br/><i>Refused = 9997;<br/>Don't know = 9998</i></div> |  | <div> <div><input type="text"/></div> <div><input type="text"/></div> <div><input type="text"/></div> <div><input type="text"/></div> </div> <div>10a. Has this<br/>AM been<br/>stocked out<br/>in the past <u>3<br/>months</u>?<br/><br/>1 = Yes<br/>0 = No<br/>99 = Don't<br/>know</div> |  | <div> <div><input type="text"/></div> <div><input type="text"/></div> <div><input type="text"/></div> <div><input type="text"/></div> </div> <div>10. Retail selling price<br/><br/><input type="text"/> bottles, ampoules or<br/>vials cost an individual customer<br/><br/><input type="text"/>KW<br/><i>Free = 00000;<br/>Refused = 99997;<br/>Don't know = 99998</i></div> |  | <div> <div><input type="text"/></div> <div><input type="text"/></div> <div><input type="text"/></div> <div><input type="text"/></div> </div> <div>11. Wholesale purchase price<br/><i>For the outlet's most recent wholesale<br/>purchase</i><br/><input type="text"/> bottles, ampoules or<br/>vials cost<br/><br/><input type="text"/>KW<br/><i>Free = 00000;<br/>Refused = 99997;<br/>Don't know = 99998</i></div> |  | <div> <div><input type="text"/></div> <div><input type="text"/></div> <div><input type="text"/></div> <div><input type="text"/></div> </div> <div>12. Comments</div> |  |

## NON-TABLET DRUG AUDIT SHEET (NT)

----

|                                                                                                                                                                             |  |                                                                                                                                                                                             |  |                                                                                                                                                                                                                                          |  |                                                                                                             |  |                                                                                                                                                                                                          |  |                                                                                                                                                                                                                                                    |  |                                              |  |
|-----------------------------------------------------------------------------------------------------------------------------------------------------------------------------|--|---------------------------------------------------------------------------------------------------------------------------------------------------------------------------------------------|--|------------------------------------------------------------------------------------------------------------------------------------------------------------------------------------------------------------------------------------------|--|-------------------------------------------------------------------------------------------------------------|--|----------------------------------------------------------------------------------------------------------------------------------------------------------------------------------------------------------|--|----------------------------------------------------------------------------------------------------------------------------------------------------------------------------------------------------------------------------------------------------|--|----------------------------------------------|--|
| 1. Generic name                                                                                                                                                             |  | 2. Strength                                                                                                                                                                                 |  | 3. Dosage form                                                                                                                                                                                                                           |  | 4. Brand name                                                                                               |  | 5. Manufacturer                                                                                                                                                                                          |  | 5a. Country of manufacture                                                                                                                                                                                                                         |  | 6. Is this antimalarial expired?             |  |
| [ ][ ]                                                                                                                                                                      |  | [ ][ ][ ][ ] . [ ] mg / [ ][ ][ ][ ] mL                                                                                                                                                     |  | 4 = Syrup                                                                                                                                                                                                                                |  |                                                                                                             |  |                                                                                                                                                                                                          |  |                                                                                                                                                                                                                                                    |  | 1 = Yes<br><br>0 = No<br><br>99 = Don't Know |  |
| [ ][ ]                                                                                                                                                                      |  | [ ][ ][ ][ ] . [ ] mg / [ ][ ][ ][ ] mL                                                                                                                                                     |  | 5 = Suspension                                                                                                                                                                                                                           |  |                                                                                                             |  |                                                                                                                                                                                                          |  |                                                                                                                                                                                                                                                    |  |                                              |  |
| [ ][ ]                                                                                                                                                                      |  | [ ][ ][ ][ ] . [ ] mg / [ ][ ][ ][ ] mL                                                                                                                                                     |  | 6 = Liquid Injection                                                                                                                                                                                                                     |  |                                                                                                             |  |                                                                                                                                                                                                          |  |                                                                                                                                                                                                                                                    |  |                                              |  |
| [ ][ ]                                                                                                                                                                      |  | [ ][ ][ ][ ] . [ ] mg / [ ][ ][ ][ ] mL                                                                                                                                                     |  | 7 = Powder injection                                                                                                                                                                                                                     |  |                                                                                                             |  |                                                                                                                                                                                                          |  |                                                                                                                                                                                                                                                    |  |                                              |  |
| [ ][ ]<br>Do not write here                                                                                                                                                 |  | (Note: no mL recorded for powders)                                                                                                                                                          |  | 8 = Other ( <i>specify</i> )                                                                                                                                                                                                             |  |                                                                                                             |  |                                                                                                                                                                                                          |  | [ ][ ]<br>Do not write here                                                                                                                                                                                                                        |  |                                              |  |
| 7. Package size<br>(Fill in number)<br><br>There are a total of<br>[ ][ ][ ][ ] mL (or mg for powder injections) in each (circle type):<br>1 = Bottle<br>2 = Ampoule / Vial |  | 8. Quantity in stock<br>(Record total # of bottles or ampoules described in Q7)<br><br>There are a total of<br>[ ][ ][ ][ ] bottles / ampoules of this antimalarial in stock at this outlet |  | 9. Amount sold/distributed in the <u>last 7 days to individual consumers</u><br>This outlet sold/distributed<br>[ ][ ][ ][ ][ ] bottles, ampoules or vials in the <u>last 7 days</u><br><br><i>Refused = 9997;<br/>Don't know = 9998</i> |  | 10a. Has this AM been stocked out in the past <u>3 months</u> ?<br><br>1 = Yes<br>0 = No<br>99 = Don't know |  | 10. Retail selling price<br><br>[ ][ ][ ][ ] bottles, ampoules or vials cost an individual customer<br><br>[ ][ ][ ][ ][ ][ ] KW<br><br><i>Free = 00000;<br/>Refused = 99997;<br/>Don't know = 99998</i> |  | 11. Wholesale purchase price<br><i>For the outlet's most recent wholesale purchase</i><br><br>[ ][ ][ ][ ][ ] bottles, ampoules or vials cost<br><br>[ ][ ][ ][ ][ ][ ] KW<br><br><i>Free = 00000;<br/>Refused = 99997;<br/>Don't know = 99998</i> |  | 12. Comments                                 |  |

1 = Yes  
0 = No **Go to Question 14**  
99 = Don't know **Go to Question 14**

1 = Yes, ***specify*** [ ] [ ]  
 [ ] [ ]  
 [ ] [ ]  
 [ ] [ ]

0 = No

99 = Don't know

1 = Yes  
0 = No      **Go to Question 15**

14b. For a child under 5, how much does a microscopic test for malaria cost? **Write cost in local currency:**

[ ][ ][ ][ ][ ] KW

00000 = Free

99999 = Don't know

1 = Yes ***Go to Question 15a before proceeding with the RDT audit***  
0 = No ***Go to Question P1***  
99 = Don't know ***Go to Question P1***

- *Mal PF*
- *SD Bioline PF Ag*
- *SD Malaria Anitigen Pf/Pan Poct*
- *Parachek etc.*

***If additional audit sheets are used, add these sheets after the ones provided and staple the questionnaire again. All pages should be in order before you move onto the next outlet.***

----

| 1. Brand name                             | 2. Manufacturer                           | 3. Country of Manufacture                 | 4. Amount sold/ distributed/ used in the last 7 days to individual consumers<br>(Record total # of tests) | 5. Retail selling price for adults                                                                                                         | 6. Retail selling price for children under 5                                                                                                 | 7. Wholesale purchase price                                                                                            | 8. Comments |
|-------------------------------------------|-------------------------------------------|-------------------------------------------|-----------------------------------------------------------------------------------------------------------|--------------------------------------------------------------------------------------------------------------------------------------------|----------------------------------------------------------------------------------------------------------------------------------------------|------------------------------------------------------------------------------------------------------------------------|-------------|
|                                           |                                           |                                           | <p>This outlet sold or distributed</p> <p>[ ][ ][ ][ ][ ] tests in the last week</p>                      | <p>For 1 test, you charge</p> <p>[ ][ ][ ][ ][ ]KW</p> <p><b>Free = 00000;</b><br/><b>Refused = 99997;</b><br/><b>Don't know=99998</b></p> | <p>For 1 test, you charge</p> <p>[ ][ ][ ][ ][ ]KW</p> <p><b>Free = 00000;</b><br/><b>Refused = 99997;</b><br/><b>Don't know = 99998</b></p> | <p>For the outlet's most recent wholesale purchase:</p> <p>[ ][ ][ ][ ] tests</p> <p>cost</p> <p>[ ][ ][ ][ ][ ]KW</p> |             |
| <p>Do not write here</p> <p>[ ][ ][ ]</p> | <p>Do not write here</p> <p>[ ][ ][ ]</p> | <p>Do not write here</p> <p>[ ][ ][ ]</p> | <p><b>Refused = 9997</b><br/><b>Don't know=9998</b></p>                                                   |                                                                                                                                            | <p><b>If the price is the same for all ages, copy the price from the previous question</b></p>                                               | <p><b>Free = 00000;</b><br/><b>Refused = 99997;</b><br/><b>Don't know = 99998</b></p>                                  |             |

| 1. Brand name                             | 2. Manufacturer                           | 3. Country of Manufacture                 | 4. Amount sold/ distributed/ used in the last 7 days to individual consumers<br>(Record total # of tests) | 5. Retail selling price for adults                                                                                                         | 6. Retail selling price for children under 5                                                                                                 | 7. Wholesale purchase price                                                                                            | 8. Comments |
|-------------------------------------------|-------------------------------------------|-------------------------------------------|-----------------------------------------------------------------------------------------------------------|--------------------------------------------------------------------------------------------------------------------------------------------|----------------------------------------------------------------------------------------------------------------------------------------------|------------------------------------------------------------------------------------------------------------------------|-------------|
|                                           |                                           |                                           | <p>This outlet sold or distributed</p> <p>[ ][ ][ ][ ][ ] tests in the last week</p>                      | <p>For 1 test, you charge</p> <p>[ ][ ][ ][ ][ ]KW</p> <p><b>Free = 00000;</b><br/><b>Refused = 99997;</b><br/><b>Don't know=99998</b></p> | <p>For 1 test, you charge</p> <p>[ ][ ][ ][ ][ ]KW</p> <p><b>Free = 00000;</b><br/><b>Refused = 99997;</b><br/><b>Don't know = 99998</b></p> | <p>For the outlet's most recent wholesale purchase:</p> <p>[ ][ ][ ][ ] tests</p> <p>cost</p> <p>[ ][ ][ ][ ][ ]KW</p> |             |
| <p>Do not write here</p> <p>[ ][ ][ ]</p> | <p>Do not write here</p> <p>[ ][ ][ ]</p> | <p>Do not write here</p> <p>[ ][ ][ ]</p> | <p><b>Refused = 9997</b><br/><b>Don't know=9998</b></p>                                                   |                                                                                                                                            | <p><b>If the price is the same for all ages, copy the price from the previous question</b></p>                                               | <p><b>Free = 00000;</b><br/><b>Refused = 99997;</b><br/><b>Don't know = 99998</b></p>                                  |             |



# Rapid Diagnostic Test Audit Sheet (RDT)

[ ]-[ ]-[ ]-[ ]-[ ]-[ ]

|                                  |                                  |                                  |                                                                                                                                                                                            |                                                                                                                                                                 |                                                                                                                                                                                                                                                                            |                                                                                                                                                                                                                           |             |
|----------------------------------|----------------------------------|----------------------------------|--------------------------------------------------------------------------------------------------------------------------------------------------------------------------------------------|-----------------------------------------------------------------------------------------------------------------------------------------------------------------|----------------------------------------------------------------------------------------------------------------------------------------------------------------------------------------------------------------------------------------------------------------------------|---------------------------------------------------------------------------------------------------------------------------------------------------------------------------------------------------------------------------|-------------|
| 1. Brand name                    | 2. Manufacturer                  | 3. Country of Manufacture        | 4. Amount sold/ distributed/ used in the last 7 days to individual consumers<br>(Record total # of tests)<br><br>This outlet sold or distributed<br><br>[ ]-[ ]-[ ] tests in the last week | 5. Retail selling price for adults<br><br>For 1 test, you charge<br><br>[ ]-[ ]-[ ]-[ ]KW<br><br><b>Free = 00000;<br/>Refused = 99997;<br/>Don't know=99998</b> | 6. Retail selling price for children under 5<br><br>For 1 test, you charge<br><br>[ ]-[ ]-[ ]-[ ]KW<br><br><b>Free = 00000;<br/>Refused = 99997;<br/>Don't know = 99998</b><br><br><i>If the price is the same for all ages, copy the price from the previous question</i> | 7. Wholesale purchase price<br><br>For the outlet's most recent wholesale purchase:<br><br>[ ]-[ ]-[ ] tests<br><br>cost<br><br>[ ]-[ ]-[ ]-[ ]KW<br><br><b>Free = 00000;<br/>Refused = 99997;<br/>Don't know = 99998</b> | 8. Comments |
| Do not write here<br><br>[ ]-[ ] | Do not write here<br><br>[ ]-[ ] | Do not write here<br><br>[ ]-[ ] | <b>Refused = 9997<br/>Don't know=9998</b>                                                                                                                                                  |                                                                                                                                                                 |                                                                                                                                                                                                                                                                            |                                                                                                                                                                                                                           |             |

|                                  |                                  |                                  |                                                                                                                                                                                            |                                                                                                                                                                 |                                                                                                                                                                                                                                                                            |                                                                                                                                                                                                                           |             |
|----------------------------------|----------------------------------|----------------------------------|--------------------------------------------------------------------------------------------------------------------------------------------------------------------------------------------|-----------------------------------------------------------------------------------------------------------------------------------------------------------------|----------------------------------------------------------------------------------------------------------------------------------------------------------------------------------------------------------------------------------------------------------------------------|---------------------------------------------------------------------------------------------------------------------------------------------------------------------------------------------------------------------------|-------------|
| 1. Brand name                    | 2. Manufacturer                  | 3. Country of Manufacture        | 4. Amount sold/ distributed/ used in the last 7 days to individual consumers<br>(Record total # of tests)<br><br>This outlet sold or distributed<br><br>[ ]-[ ]-[ ] tests in the last week | 5. Retail selling price for adults<br><br>For 1 test, you charge<br><br>[ ]-[ ]-[ ]-[ ]KW<br><br><b>Free = 00000;<br/>Refused = 99997;<br/>Don't know=99998</b> | 6. Retail selling price for children under 5<br><br>For 1 test, you charge<br><br>[ ]-[ ]-[ ]-[ ]KW<br><br><b>Free = 00000;<br/>Refused = 99997;<br/>Don't know = 99998</b><br><br><i>If the price is the same for all ages, copy the price from the previous question</i> | 7. Wholesale purchase price<br><br>For the outlet's most recent wholesale purchase:<br><br>[ ]-[ ]-[ ] tests<br><br>cost<br><br>[ ]-[ ]-[ ]-[ ]KW<br><br><b>Free = 00000;<br/>Refused = 99997;<br/>Don't know = 99998</b> | 8. Comments |
| Do not write here<br><br>[ ]-[ ] | Do not write here<br><br>[ ]-[ ] | Do not write here<br><br>[ ]-[ ] | <b>Refused = 9997<br/>Don't know=9998</b>                                                                                                                                                  |                                                                                                                                                                 |                                                                                                                                                                                                                                                                            |                                                                                                                                                                                                                           |             |

[ ]-[ ]-[ ]-[ ]-[ ]

| 1. Brand name                             | 2. Manufacturer                           | 3. Country of Manufacture                 | 4. Amount sold/ distributed/ used in the last 7 days to individual consumers<br>(Record total # of tests) | 5. Retail selling price for adults                                                                                                         | 6. Retail selling price for children under 5                                                                                                 | 7. Wholesale purchase price                                                                                            | 8. Comments |
|-------------------------------------------|-------------------------------------------|-------------------------------------------|-----------------------------------------------------------------------------------------------------------|--------------------------------------------------------------------------------------------------------------------------------------------|----------------------------------------------------------------------------------------------------------------------------------------------|------------------------------------------------------------------------------------------------------------------------|-------------|
|                                           |                                           |                                           | <p>This outlet sold or distributed</p> <p>[ ][ ][ ][ ][ ] tests in the last week</p>                      | <p>For 1 test, you charge</p> <p>[ ][ ][ ][ ][ ]KW</p> <p><b>Free = 00000;</b><br/><b>Refused = 99997;</b><br/><b>Don't know=99998</b></p> | <p>For 1 test, you charge</p> <p>[ ][ ][ ][ ][ ]KW</p> <p><b>Free = 00000;</b><br/><b>Refused = 99997;</b><br/><b>Don't know = 99998</b></p> | <p>For the outlet's most recent wholesale purchase:</p> <p>[ ][ ][ ][ ] tests</p> <p>cost</p> <p>[ ][ ][ ][ ][ ]KW</p> |             |
| <p>Do not write here</p> <p>[ ][ ][ ]</p> | <p>Do not write here</p> <p>[ ][ ][ ]</p> | <p>Do not write here</p> <p>[ ][ ][ ]</p> | <p><b>Refused = 9997</b><br/><b>Don't know=9998</b></p>                                                   |                                                                                                                                            | <p><b>If the price is the same for all ages, copy the price from the previous question</b></p>                                               | <p><b>Free = 00000;</b><br/><b>Refused = 99997;</b><br/><b>Don't know = 99998</b></p>                                  |             |

| 1. Brand name                             | 2. Manufacturer                           | 3. Country of Manufacture                 | 4. Amount sold/ distributed/ used in the last 7 days to individual consumers<br>(Record total # of tests) | 5. Retail selling price for adults                                                                                           | 6. Retail selling price for children under 5                                                                                   | 7. Wholesale purchase price                                                                                            | 8. Comments |
|-------------------------------------------|-------------------------------------------|-------------------------------------------|-----------------------------------------------------------------------------------------------------------|------------------------------------------------------------------------------------------------------------------------------|--------------------------------------------------------------------------------------------------------------------------------|------------------------------------------------------------------------------------------------------------------------|-------------|
|                                           |                                           |                                           | <p>This outlet sold or distributed</p> <p>[ ][ ][ ][ ][ ] tests in the last week</p>                      | <p>For 1 test, you charge</p> <p>[ ][ ][ ][ ][ ]KW</p> <p><b>Free = 00000;<br/>Refused = 99997;<br/>Don't know=99998</b></p> | <p>For 1 test, you charge</p> <p>[ ][ ][ ][ ][ ]KW</p> <p><b>Free = 00000;<br/>Refused = 99997;<br/>Don't know = 99998</b></p> | <p>For the outlet's most recent wholesale purchase:</p> <p>[ ][ ][ ][ ] tests</p> <p>cost</p> <p>[ ][ ][ ][ ][ ]KW</p> |             |
| <p>Do not write here</p> <p>[ ][ ][ ]</p> | <p>Do not write here</p> <p>[ ][ ][ ]</p> | <p>Do not write here</p> <p>[ ][ ][ ]</p> | <p><b>Refused = 9997<br/>Don't know=9998</b></p>                                                          |                                                                                                                              | <p><b>If the price is the same for all ages, copy the price from the previous question</b></p>                                 | <p><b>Free = 00000;<br/>Refused = 99997;<br/>Don't know = 99998</b></p>                                                |             |

#### IV. Provider Questionnaire

P1. What is your job at this outlet? **Do not read list. Multiple responses allowed.**

- 1 = Pharmacist
- 2 = Medical doctor
- 3 = Midwife
- 4 = Nurse
- 5 = Lab technician
- 6 = Owner
- 7 = Shop assistant
- 8 = Relative of the owner
- 9 = Other (*specify*) [\_\_\_\_\_]

P2. For how many years have you worked in this outlet? **If less than 1 year, enter 01.** [ ] [ ] years

P3. In your opinion, for treating uncomplicated malaria in children under five, what is the most effective antimalarial medicine?

**Looking for either Generic name or Brand name. Ask provider to show you the medicine if in stock.**

[\_\_\_\_\_]

99 = Don't know

P3a. In your opinion, for treating uncomplicated malaria in adults, what is the most effective antimalarial medicine?

**Looking for either Generic name or Brand name. Ask provider to show you the medicine if in stock.**

[\_\_\_\_\_]

99 = Don't know

P4. What antimalarial medicine for treating uncomplicated malaria, do you most often recommend to customers?

**Looking for Generic name or Brand name. Ask provider to show you the medicine if in stock.**

[\_\_\_\_\_]

99 = Don't know

P5. How do you typically decide which antimalarials to stock? **Read list. Multiple responses allowed.**

- 1 = Most profitable
- 2 = Recommended by government
- 3 = Lowest priced
- 4 = Drug company/sales rep influence
- 5 = Consumer demand
- 6 = Brand reputation
- 7 = Dosage form
- 8 = Easily available
- 9 = Prescribed most often by doctors
- 10 = Other (*specify*) [\_\_\_\_\_]
- 99 = Don't know

P6. Do your customers usually ask for a specific antimalarial medicine by name? **Read list. One response only.**

- 1 = Yes
- 0 = No
- 2 = No, they have a written prescription
- 99 = Don't know

P7. Do you normally decide which antimalarial medicines customers receive? **Read list. One response only.**

- 1 = Yes
- 0 = No
- 2 = No, they have a written prescription
- 99 = Don't know

P8. **(Only ask providers in private facilities. If outlet is a Public Health Facility, SKIP to question P9)** In the last month, have customers bought antimalarials on credit?

- 1 = Yes
- 0 = No **Go to question P9**
- 99 = Don't know **Go to question P9**

P8a. In the past month, how many customers have bought antimalarials on credit?

[ ]-[ ]-[ ]  
999 = Don't know

P8b. Which customers have bought antimalarial medicines on credit? **Do not read list. Multiple responses allowed.**

- 1 = Regular customers
- 2 = Outlet staff
- 3 = People who can't afford to pay
- 4 = Clients with sick children
- 5 = Clients who are known to provider
- 6 = Other **(specify)** [\_\_\_\_\_]
- 99 = Don't know

P9. In the past month, did you ever cut blister packs or sell partial packs of antimalarials?

- 1 = Yes
- 0 = No **Go to P10**
- 99 = Don't know **Go to P10**

P9a. What is the most common reason why you cut blisters or sell partial packs?

**Do not read list. One response only.**

- 1 = Full blister or pack is too expensive for patient
- 2 = It is more profitable to sell partial blister or pack
- 3 = Cut or partial is sufficient / Full blister or pack has too many pills
- 4 = I have small / insufficient stock
- 5 = Other **(specify)** [\_\_\_\_\_]
- 99 = Don't know

**Go to P13**



P19. How many people working in this outlet (including the owner) have the following types of health qualifications?

**Read list. Enter '00' if the answer is 'none.'**

- |      |                          |         |
|------|--------------------------|---------|
| I.   | Pharmacist               | [ ] [ ] |
| II.  | Pharmacy technician      | [ ] [ ] |
| III. | Pharmacy assistant       | [ ] [ ] |
| IV.  | Medical doctor           | [ ] [ ] |
| V.   | Nurse / Midwife          | [ ] [ ] |
| VI.  | Clinical officer         | [ ] [ ] |
| VII. | Other ( <i>specify</i> ) | [ ] [ ] |
|      | [ ]                      |         |

### Section V: Observation Record

P20. Are medicines stored in a dry area?

- 1 = Yes, stored in a dry area  
 0 = No, not stored in a dry area  
 8 = Did not observe medicines

P21. Are medicines protected from direct sunlight?

- 1 = Yes, protected from direct sunlight  
 0 = No protections from direct sunlight  
 8 = Did not observe medicines

P22. Are medicines kept on the floor?

- 1 = Yes, they are kept on the floor  
 0 = No, not kept on the floor  
 8 = Did not observe medicines

### DRUG POLICY CHANGE INFORMATION

D1. Are you aware of a government ban of some antimalarial medicines for treatment of uncomplicated malaria?

- 1 = Yes **Go to question D2**  
 0 = No **Go to Section VI**

D2. What antimalarial medicine is currently banned?

- 1 = Correct answer: Artemisinin monotherapies. **Go to question D3**  
 0 = Other answer (*specify*) **Go to Section VI**  
 [ ]

D3. Why do you think this type of antimalarial medicine was banned? **Do not read list. Multiple responses allowed.**

- 1 = Drug resistance  
 2 = Cost  
 3 = Other (*specify*) [ ]  
 99 = Don't know

**Section VI: Products Tracking Sheet**1. Total number of Tablet, Suppository& Granule **Products** Audited

[ ] [ ] [ ]

2. Total number of Non-Tablet **Products** Audited

[ ] [ ] [ ]

3. Total number of RDT **Products Audited**

[ ] [ ] [ ]

*Thank the provider for their participation.*

**Return to question C10** to record final status of interview and time of completion, then complete the section VII **Ending the Interview.**
